# A visual pathway for skylight polarization processing in *Drosophila*

Ben J. Hardcastle<sup>1\*</sup>, Jaison J. Omoto<sup>2</sup>, Pratyush Kandimalla<sup>2</sup>, Bao-Chau M. Nguyen<sup>2</sup>, Mehmet F. Keleş<sup>1</sup>, Natalie K. Boyd<sup>2</sup>, Volker Hartenstein<sup>2</sup>, Mark A. Frye<sup>1</sup>

<sup>1</sup>Department of Integrative Biology and Physiology, University of California, Los Angeles, CA 90095, USA

<sup>2</sup>Department of Molecular, Cell and Developmental Biology, University of California, Los Angeles, CA 90095, USA

\*hardcastle@ucla.edu

## SUMMARY

Many insects use patterns of polarized light in the sky to orient and navigate. Here we functionally characterize neural circuitry in the fruit fly, *Drosophila melanogaster*, that conveys polarized light signals from the eye to the central complex, a brain region essential for the fly's sense of direction. Neurons tuned to the angle of polarization of ultraviolet light are found throughout the anterior visual pathway, connecting the optic lobes with the central complex via the anterior optic tubercle and bulb, in a homologous organization to the 'sky compass' pathways described in other insects. We detail how a consistent, map-like organization of neural tunings in the peripheral visual system is transformed into a reduced representation suited to flexible processing in the central brain. This study identifies computational motifs of the transformation, enabling mechanistic comparisons of multisensory integration and central processing for navigation in the brains of insects.

## INTRODUCTION

A critical challenge of active locomotion is knowing the right way to go. Sensorimotor reflexes can influence momentary changes in direction to hold a course or to avoid looming threats, but goal-directed behaviors, such as returning to a previous location from unfamiliar surroundings, require additional information and processing (Braitenberg, 1986; Gomez-Marin et al., 2010). External sensory cues must be transformed into an internal representation of position and orientation within the environment, which can also be modified by past experience (Collett and Collett, 2002). In Dipteran flies, as in other invertebrates, a collection of neuropils known as the central complex (CX) is believed to coordinate such behaviors and plays a role in spatial memory, object memory, and action selection (Giraldo et al., 2018; Neuser et al., 2008; Ofstad et al., 2011; Strausfeld and Hirth, 2013), in addition to homeostatic processes including hunger and sleep (Donlea et al., 2014; Dus et al., 2013; Liu et al., 2016).

Recent studies in *Drosophila* have revealed that activity in a network of CX neurons encodes and maintains a representation of the animal's angular heading relative to its environment (Kim et al., 2017; Seelig and Jayaraman, 2015), with similarity to head-direction cells in vertebrates (Taube et al., 1990). This neural representation of heading can be updated by internal, proprioceptive estimates of self-motion during locomotion, and by external cues, such as moving visual patterns and directional airflow (Fisher et al., 2019; Green et al., 2017; Kim et al., 2019; Okubo et al., 2020; Shiozaki et al., 2020). In other insects, including locusts, crickets, bees, butterflies, and beetles, the functional organization of the CX has frequently been studied in

the context of navigation via celestial cues, particularly polarized light (Heinze, 2014). The nearly ever-present pattern of polarization in the sky, formed by scattering of light in the atmosphere, offers an indicator of orientation to organisms able to detect and interpret it, and may be more stable than terrestrial landmarks (Cronin and Marshall, 2011; Dacke et al., 2003; v. Frisch, 1949; Horváth and Varju, 2004; Mappes and Homberg, 2004; Wehner and Müller, 2006). In these non-Dipteran insects, a multimodal neural circuit transmits polarization signals from the eyes to the central complex (Heinze, 2013; Heinze and Reppert, 2011; Homberg et al., 2011; el Jundi et al., 2014, 2015; Pfeiffer et al., 2005). This circuit is known as the 'sky compass' pathway for its proposed role in processing skylight polarization patterns and information about the position of the sun to bestow an animal with a sense of direction. In *Drosophila*, the anterior visual pathway (AVP), which comprises neurons connecting the medulla, anterior optic tubercle, bulb, and ellipsoid body, has been postulated to represent the homologue of the sky compass pathway (Omoto et al., 2017; Timaeus et al., 2017; Warren et al., 2019). Visual processing in the AVP appears to be segregated into three topographically-organized, parallel streams, of which two have been shown to encode distinct small-field, unpolarized stimuli (Omoto et al., 2017; Seelig and Jayaraman, 2013; Shiozaki and Kazama, 2017; Sun et al., 2017). The neurons involved in polarization processing in *Drosophila* have not been identified beyond peripheral circuits of the dorsal rim area, a specialized region of the eye for detecting skylight polarization (Fortini and Rubin, 1991; Wada, 1974; Weir and Dickinson, 2015; Weir et al., 2016; Wernet et al., 2012; Wolf et al., 1980). A detailed mapping of the relevant polarization-sensitive neurons would allow the exquisite genetic tools and connectomic studies available in *Drosophila* (Scheffer et al., 2020) to be leveraged to understand the workings of the CX and its integration of multiple sensory modalities. Behavioral experiments have demonstrated that *Drosophila* orient relative to polarization patterns while walking and in tethered-flight (Mathejczyk and Wernet, 2019; Stephens et al., 1953; Warren et al., 2018; Weir and Dickinson, 2011; Wernet et al., 2012; Wolf et al., 1980). A comparative approach would therefore provide insight into the processing strategies employed across taxa as well as species-specific adaptations (Honkanen et al., 2019). Furthermore, it may be possible to reconcile the existing evidence of a common, fixed representation of polarization patterns in the CX of non-Dipteran insects (Heinze and Homberg, 2007; Heinze and Reppert, 2011; Stone et al., 2017) with the emerging model of a flexible representation of both visual information and heading direction in the *Drosophila* CX (Fisher et al., 2019; Kim et al., 2017, 2019; Seelig and Jayaraman, 2015; Turner-Evans et al., 2020). Alternatively, fundamental differences in the organization and processing of polarized light signals between species may reflect specialized navigational requirements.

99 Here, we set out to test the hypothesis that the anterior visual  
100 pathway conveys polarized light signals from the eye to the central  
101 complex in *Drosophila*. We used neurogenetic tracing techniques  
102 and in vivo calcium imaging to characterize the organization of the  
103 neurons at each stage and their coding and transformation of  
104 visual features. We show that parallel circuitry in the medulla  
105 conducts polarization signals from photoreceptors in the dorsal rim  
106 area to a stereotyped domain of the anterior optic tubercle. From  
107 there, a postsynaptic population of neurons projecting to the  
108 anterior bulb relays polarization signals to ring neurons of the  
109 ellipsoid body, and in turn, the 'compass neurons' of the central  
110 complex. The superior bulb multiplexes polarized and unpolarized  
111 light signals, while the inferior bulb does not appear to be involved  
112 in polarization processing. Finally, we examine population  
113 responses in the central complex and find hallmarks of a flexible  
114 encoding of a single angle of polarization which could be used to  
115 direct motor output for navigation behavior.

## 116 RESULTS

117 In flies, the pair of inner photoreceptors in each ommatidium,  
118 R7/R8, are involved in the detection of color and linear polarization  
119 of light (Hardie, 1984). Within a narrow strip of skyward-facing  
120 ommatidia in each eye, known as the dorsal rim area (DRA), each  
121 R7/R8 pair is sensitive to a different angle of polarization (AoP,  
122 also referred to as the e-vector orientation), organized in a  
123 'polarotopic' fashion (Fig. 1A). This specialized array of polarization  
124 detectors covers the complete 180° range of orientations and, with  
125 a peak spectral sensitivity to UV light, is well-suited to sensing the  
126 patterns of polarized light in the sky for navigation (Feiler et al.,  
127 1992; Salcedo et al., 1999; Sharkey et al., 2020; Weir et al., 2016).  
128 A previous characterization of DRA R7/R8 in *Drosophila*  
129 established the spatial organization of their tunings, and their  
130 visual response properties (Weir et al., 2016). Here, we followed  
131 the pathway for skylight polarization signals from the eye and  
132 investigated direct downstream targets of DRA R7/R8s at their  
133 axon terminals in the second optic neuropil, the medulla (ME).

### 134 Polarized light processing in the medulla dorsal rim area

135 First, we concentrated on distinct morphological forms of distal  
136 medulla (Dm) interneurons which are localized to the medulla  
137 dorsal rim area (MEDRA). Two types of these interneurons have  
138 been anatomically characterized, DmDRA1 and DmDRA2.  
139 Individual DmDRA1 neurons span approximately ten MEDRA  
140 columns and receive input exclusively from DRA R7  
141 photoreceptors while avoiding input from non-DRA columns  
142 (Sancer et al., 2019). DmDRA2 receives exclusive input from DRA  
143 R8 photoreceptors. Due to their contact with polarization-sensitive  
144 photoreceptors, both DmDRA subtypes are thought likely to  
145 respond to polarized light (Sancer et al., 2019). To test this, we  
146 generated a split-Gal4 driver (R13E04-AD, VT059781-DBD) for a  
147 population of DmDRA neurons (Fig. 1B, top left) (Courgeon and  
148 Desplan, 2019; Jenett et al., 2012). To identify which subtype  
149 expressed this driver, we co-labeled it with an established Dm8  
150 driver (R24F06-LexA) which is known to be expressed in DmDRA1  
151 and not DmDRA2 (Sancer et al., 2019). We found highly  
152 overlapping expression between these drivers (Fig. 1B, top right),  
153 indicating that the split-Gal4 is predominantly expressed in  
154 DmDRA1. We confirmed that DmDRA neurons in the split-Gal4  
155 were also in close proximity to photoreceptor terminals in the  
156 MEDRA, and found clear overlap with the proximal tip of each

157 DRA R7/R8 pair, providing further evidence of exclusive contact  
158 with DRA R7 (Fig. 1B, bottom). Hereafter, we refer to this driver as  
159 the DmDRA1-split.

160 After validating a polarized light stimulus by confirming the  
161 previously characterized response properties of DRA R7/R8 (Weir  
162 et al., 2016) (Fig. S1), we recorded presynaptic calcium signals in  
163 the DmDRA1-split using GCaMP6s localized to synapses (Cohn et  
164 al., 2015) while presenting different angles of polarization (AoP) to  
165 the dorsal rim (Fig. 1C, Fig. S1). We found that the activity of  
166 DmDRA1 neurons varied with the AoP presented and followed a  
167 sinusoidal response profile typical of polarization-sensitive neurons  
168 (Heinze, 2013). To quantify the extent to which the neurons were  
169 modulated by the AoP, we calculated a polarization-selectivity  
170 index (PSI) by comparing the peak response with the response at  
171 orthogonal angles (Fig. 1D). PSI values had a minimum possible  
172 value of 0, indicating equal responses to all angles presented, and  
173 a maximum of possible value of 1, indicating maximum response  
174 to two diametrically opposite angles with zero activity at their two  
175 respective orthogonal angles. Amongst DmDRA1 neurons, we  
176 found high PSI values throughout with an average of 0.74, while  
177 background regions in each recording contained an average PSI of  
178 0.20 (Fig. 1D,E). When we repeated the experiment with the linear  
179 polarizer removed from the stimulus device, all neurons were  
180 suppressed at the initial onset of unpolarized UV light and were no  
181 longer modulated by the rotation of the device (Fig. 1C). The PSI  
182 values of the neurons then reflected this lack of modulation, falling  
183 by approximately 80%, whereas the PSI values in the background  
184 showed no change (Fig. 1D,F).

185 Within the population of DmDRA1 neurons, we observed  
186 preferential responses to different angles of polarized light  
187 depending on their position in the MEDRA (Fig. 1C,G). The  
188 preferred AoP showed a linear relationship with position, which we  
189 refer to as polarotopy (Fig. 1H). Moving anterior to posterior in the  
190 right optic lobe, the preferred AoP shifted counter-clockwise (Fig.  
191 1G,H). This polarotopy was mirrored in the left optic lobe, with a  
192 similar range of preferred AoPs represented in the opposite  
193 posterior-anterior direction (Fig. S11). Throughout the MEDRA, the  
194 preferred AoPs of DmDRA1 neurons closely matched those of R8  
195 photoreceptors at similar positions (Fig. 1H, Fig. S1E). Since  
196 R7/R8 are likely inhibitory (Davis et al., 2020; Gao et al., 2008), we  
197 expected that the preferred AoP of a neuron postsynaptic to either  
198 R7 or R8 would be shifted by 90°. We therefore posit that it is R7  
199 signals that are responsible for the predominant response  
200 characteristics of DmDRA1 neurons, supporting our anatomical  
201 data (Fig. 1B) and the connectivity of the DmDRA1 subtype  
202 (Sancer et al., 2019).

203 We then asked whether DmDRA1 neurons are inhibited by  
204 anti-preferred angles, which would likely require antagonistic  
205 processing of local, orthogonally-tuned R7 and R8 signals in the  
206 MEDRA. Although DmDRA1 does not contact R8, inhibitory  
207 interactions between R7/R8 in each column suggest that direct  
208 input may not be necessary (Weir et al., 2016). We first identified  
209 anterior regions in the MEDRA where the preferred AoP of  
210 DmDRA1 was found to be around 0° in the previous tuning  
211 experiment (Fig. 1G) and generated ROIs around similarly tuned  
212 pixels (Fig. S2A,B). We then measured the responses of each ROI  
213 to flashes of UV light with 0° and 90° AoP (Fig. S2C). The  
214 preferred AoP of 0° caused an increase in activity while flashes at  
215 90° caused inhibition of greater magnitude, followed by a slight  
216 rebound above baseline after the offset of the flash (Fig. S2C). For  
217 light flashes with the polarizer removed we observed inhibition of  
218 DmDRA1 at all regions, regardless of position in the DRA (Fig.

219 S2C'). Taken together, these results support a model of 221 excited and inhibited by orthogonal angles of polarized light, and  
 220 polarization-opponent processing, whereby DmDRA1 neurons are 222 inhibited by unpolarized light.

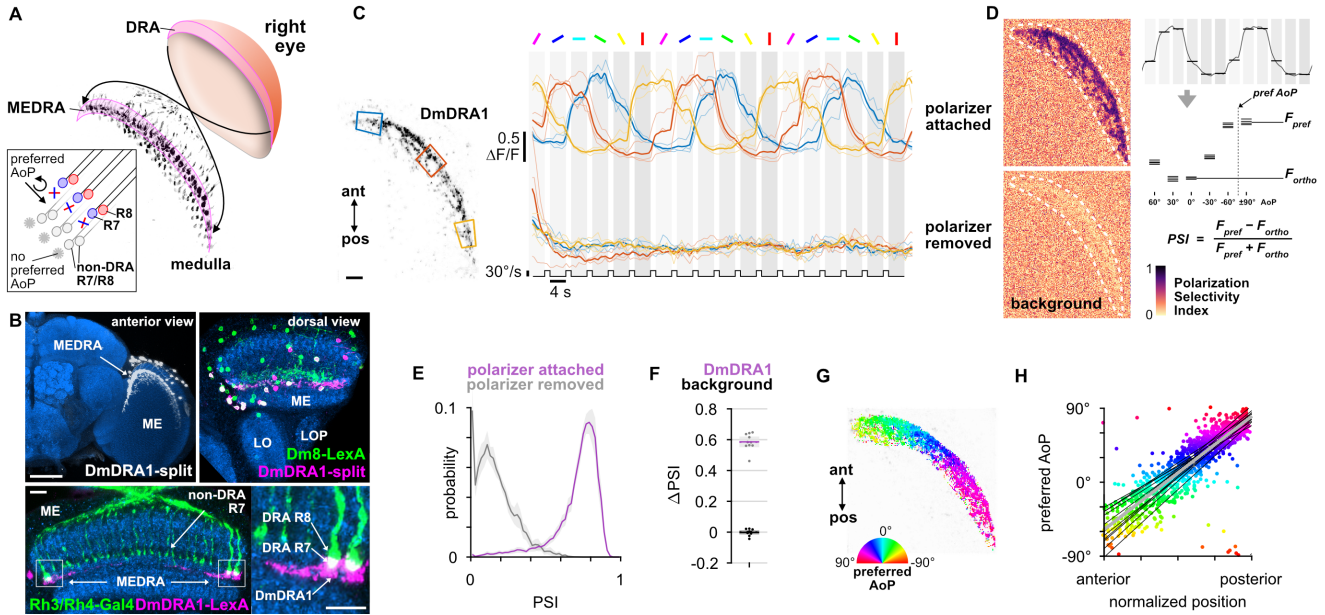

223 **Figure 1: Polarized light processing in the medulla dorsal rim area**

224 **A:** Schematic of the dorsal rim area (DRA) of the right eye and the projection of DRA R7/R8 photoreceptors to corresponding columns in the medulla dorsal rim area (MEDRA). Inset: R7  
 225 and R8 in an individual column are tuned to orthogonal angles of polarization (AoP), and their tunings change linearly across the MEDRA.  
 226 **B:** Top, left: Confocal projection (anterior view) of DmDRA1 expression pattern in the MEDRA (DmDRA1-split>GFP, green; DmDRA1-split>RFP, magenta) (mean cell bodies per brain hemisphere, DmDRA: 23.13, SEM 1.16; Dm8∩DmDRA: 21.25,  
 227 SEM 0.49, N = 8 animals). Bottom, left: Dorsal view of the medulla showing DRA R7/R8 photoreceptors (Rh3/Rh4-Gal4, green) and their proximity to DmDRA1 neurons (R13E04-LexA,  
 228 SEM 0.49, N = 8 animals). Scale bar denotes 10 μm. Bottom, right: Enlargement of medulla dorsal rim area (MEDRA).  
 229 **C:** Left: Example time-averaged maximum-intensity projection showing dorso-posterior two-photon imaging view of GCaMP activity in DmDRA1 neurons (DmDRA1-split>sytGCaMP6s).  
 230 Three ROIs were manually drawn in anterior (blue), dorsal (red), and posterior (yellow) MEDRA in each recording. Scale bar denotes 10 μm. Right: Time-series of normalized mean  
 231 intensity values for ROIs in equivalent positions in three animals (thin traces) and their mean (thick trace), with the polarizing filter (polarizer) attached (top) and removed (bottom).  
 232 Shaded patches denote periods that the polarizer remained at a fixed orientation.  
 233 **D:** Example spatial maps of polarization-selectivity index (PSI) for the example recordings in C with the polarizer attached (top) and removed (bottom).  
 234 **E:** Probability distributions of PSI values in DmDRA1 neurons with the polarizer attached (average PSI DmDRA: 0.74, CI 0.06, N = 10 animals) and removed (average PSI DmDRA1  
 235 control: 0.16, CI 0.07, N = 7 animals). Mean ± CI.  
 236 **F:** Effect of polarizer on median PSI values versus controls with polarizer removed, within DmDRA1 neurons (light dots) and background regions (dark dots) in individual animals  
 237 (DmDRA, pink line: mean ΔPSI = 0.59, CI 0.06, N = 10, p < 10<sup>-6</sup> t-test; background, black line: mean ΔPSI = -0.002, CI 0.02, N = 10, p = 0.82, t-test).  
 238 **G:** Example polarization tuning map for DmDRA1. Preferred angles of polarization are shown for each pixel with an above-threshold PSI value using the color map shown. Pixels with a  
 239 below-threshold PSI value, or falling outside an ROI drawn around the DmDRA1 population, show average intensity in grayscale. Data shown are from maximum-selectivity projections  
 240 through the MEDRA.  
 241 **H:** Scatter plot showing the common polarotopic organization of DmDRA1 neurons. Individual points represent pixels recorded from DmDRA1 neurons, showing their normalized  
 242 horizontal position in the MEDRA and their preferred angle of polarization (AoP). Thin lines show linear-circular fits for data from individual animals with significant correlations (mean ρ =  
 243 0.89, SEM 0.06, N = 10 animals), thick line shows fit for all pooled data (ρ = 0.85, N = 10 recordings, p < 10<sup>-6</sup> permutation test).

## 245 Medulla projection neurons convey polarized light signals to 246 the AOTU

247 In other insect species, polarization-sensitive photoreceptors in the  
 248 dorsal rim are thought to provide input to transmedulla neurons  
 249 (also referred to as line-tangential neurons) which project from the  
 250 optic lobe to the anterior optic tubercle (AOTU) (Homberg et al.,  
 251 2003; Immonen et al., 2017; el Jundi et al., 2011; Pfeiffer and  
 252 Kinoshita, 2012; Zeller et al., 2015). In all species investigated, it is  
 253 the small subunit of the AOTU (often called the lower-unit, LU)  
 254 which is involved in processing polarized light signals (Heinze,  
 255 2013), although to our knowledge these signals have not been  
 256 explored in transmedulla neurons themselves. In *Drosophila*,  
 257 corresponding medullo-tubercular (MeTu) neurons have been  
 258 described (Fig. 2A), some of which have been shown to play a role  
 259 in color vision-dependent behaviors (Omoto et al., 2017; Otsuna  
 260 et al., 2014). The dendrites of individual MeTu neurons typically  
 261 innervate 10–15 columns of the medulla in layers M6–7 (Omoto et  
 262 al., 2017) (Fig. S3) and, as an ensemble, tile larger areas of the  
 263 medulla (Fig. 2A). We predicted that MeTu neurons with dendrites  
 264 in the MEDRA would be postsynaptic to DmDRA1 neurons and/or

265 DRA R7/R8, and would therefore similarly respond to polarized  
 266 light.

267 We used the anterograde circuit tracing technique *trans*-Tango  
 268 (Talay et al., 2017) to identify putative postsynaptic partners of the  
 269 DmDRA1 neurons and R7/R8 photoreceptors (Fig. 2B,C). We  
 270 found that DmDRA1-split driving *trans*-Tango labeled a population  
 271 of neurons in the dorsal medulla, along with innervation of the  
 272 small, lateral subunit of the AOTU via a fiber bundle in the anterior  
 273 optic tract (AOT) (Fig. 2B), which matched the anatomy of MeTu  
 274 neurons (Fig. 2A). We then used a Gal4 driver which targets  
 275 neurons expressing the UV-sensitive rhodopsins Rh3 and Rh4  
 276 (pan-R7-Gal4, which we refer to as Rh3/Rh4-Gal4), which includes  
 277 DRA R7/R8, and again found *trans*-Tango labeling of the small  
 278 subunit of the AOTU (Fig. 2C). However, since the Rh3/Rh4 driver  
 279 is also expressed in non-DRA R7 photoreceptors (Fig. 2C), the  
 280 labeling of MeTu neurons we observed could have been due to  
 281 synaptic contacts exclusively outside of the MEDRA. To evaluate  
 282 this possibility, we co-labeled a population of MeTu neurons and all  
 283 photoreceptors using the antibody mAb24B10 (Fujita et al., 1982)  
 284 (Fig. S3A). Throughout layer M6 in the dorsal medulla, MeTu  
 285 dendrites were in close proximity to R7/R8 terminals and we found



clear overlap with R7 terminals in the MEDRA (Fig. S3A). In short, these putative connections suggest a parallel pathway for polarization signals in the MEDRA: DRA R7→DmDRA1, DmDRA1→MeTu, DRA R7→MeTu.

Several discrete populations of MeTu neurons have been characterized, based on the distinct domains of the small subunit of the AOTU that their terminals occupy: intermediate-medial (im), intermediate-lateral (il), and lateral (l), which is further divided into anterior (la), central (lc), and posterior (lp) domains (Fig. 2A',A'', Fig. S3B). The larger subunit comprising the medial domain (m) is not innervated by MeTu neurons and corresponds to the polarization-insensitive upper-unit (UU) of other species (Omoto et al., 2017; Timaeus et al., 2017). We examined the domains of the AOTU targeted by the putatively polarization-sensitive MeTu neurons which were labeled by *trans*-Tango (Fig. 2B'-C'). Both the DmDRA1 and Rh3/Rh4 *trans*-Tango experiments predominantly labeled the intermediate-lateral domain (AOTU<sub>il</sub>), with

encroachment on the lateral domain (AOTU<sub>l</sub>) (Fig. 2B''-C''). We found no detectable intermediate-medial (AOTU<sub>im</sub>) or medial (AOTU<sub>m</sub>) labeling in either (Fig. 2B'-C'). We next identified two Gal4 drivers for populations of MeTu neurons arborizing in the AOTU<sub>l</sub> and AOTU<sub>il</sub>: one with dendrites predominantly tiling the dorsal medulla (R56F07-Gal4) (Fig. 2A) and one with dendrites throughout the medulla (R73C04-Gal4) (Fig. 3G) (Omoto et al., 2017). From confocal images of single-cell MCFO (MultiColor FlpOut) clones (Nern et al., 2015), we determined a consistent relationship between the anterior→posterior position of MeTu dendrites in the MEDRA and the ventral→dorsal position of MeTu axon terminals in the AOTU (Fig. 2E, Fig. S3). For MeTu neurons with dendrites outside of the MEDRA, we found no clear relationship between ventrodorsal position in the medulla and mediolateral position in the AOTU, confirming a previous study (Timaeus et al., 2017).

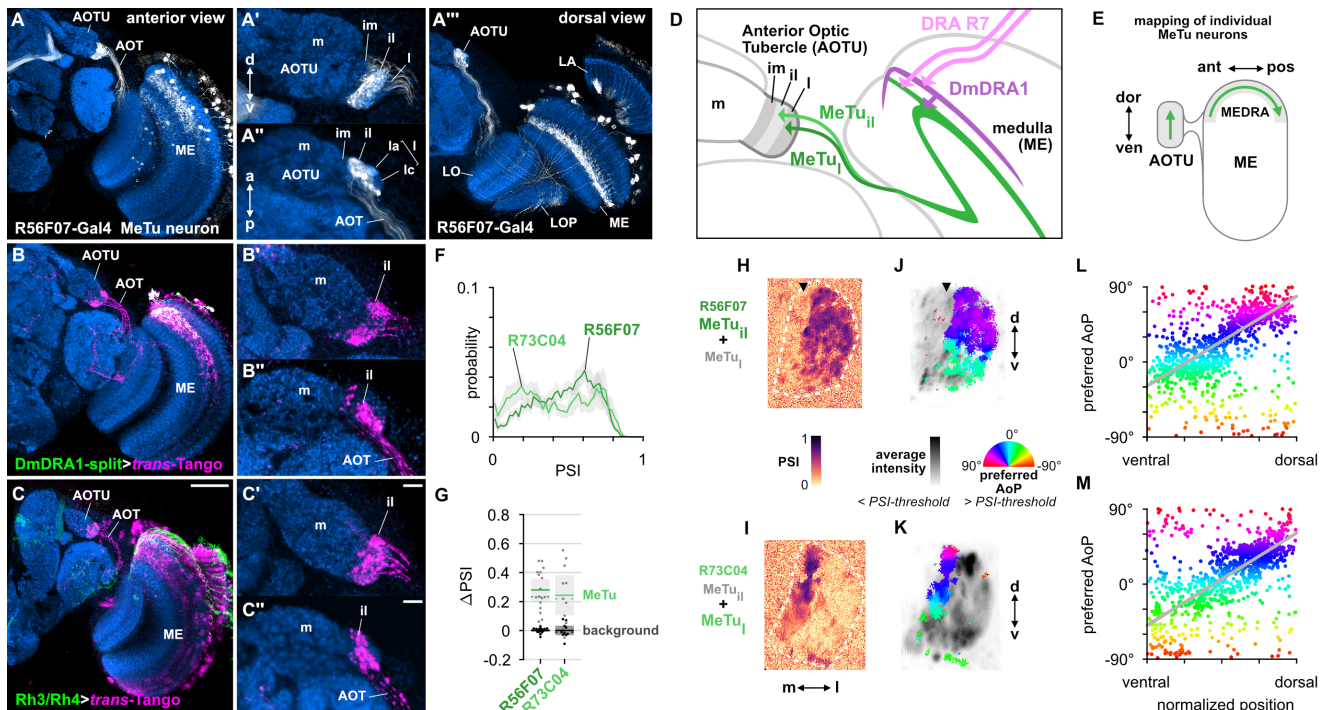

**Figure 2: Medulla projection neurons convey polarized light signals to the AOTU**

**A:** Confocal projection (anterior view) of R56F07-Gal4 driving a population of MeTu neurons with dendrites in the dorsal medulla (ME) and projections to anterior optic tubercle (AOTU) via the anterior optic tract (AOT). High magnification anterior (A') and dorsal (A'') views. A''': Dorsal view.  
**B:** Confocal projection (anterior view) of *trans*-Tango signal (magenta) labeling putative postsynaptic partners from DmDRA1-Gal4 (green). High magnification anterior (B') and dorsal (B'') view.  
**C:** Confocal projection (anterior view) of *trans*-Tango signal (magenta) labeling putative postsynaptic partners from Rh3/Rh4-Gal4 (green), which labels DRA R7/R8 + non-DRA R7. Scale bar denotes 50  $\mu$ m. High magnification anterior (C') and dorsal (C'') views (scale bars denote 10  $\mu$ m).  
**D:** Schematic of proposed parallel connectivity in the medulla dorsal rim area (MEDRA) and regions of the AOTU targeted by polarization-sensitive MeTu neurons.  
**E:** Schematic of proposed one-dimensional mapping of MEDRA position to AOTU based on single-cell clones (see Fig. S3).  
**F:** Probability distributions of PSI values in MeTu neurons (average PSI R56F07: 0.48, CI 0.14, N = 17 animals; R73C04: 0.42, CI 0.20, N = 11 animals). Mean  $\pm$  CI.  
**G:** Effect of polarizer on median PSI values versus controls with polarizer removed, within MeTu neurons (light dots) and background regions (dark dots) in individual animals (R56F07 MeTu, green line: mean  $\Delta$ PSI = 0.28, CI 0.14, N = 17,  $p < 10^{-6}$  t-test; R56F07 background, black line: mean  $\Delta$ PSI = 0.001, CI 0.02, N = 17,  $p = 0.84$ , t-test; R73C04 MeTu, green line: mean  $\Delta$ PSI = 0.25, CI 0.20, N = 11,  $p = 0.03$  t-test; R73C04 background, black line: mean  $\Delta$ PSI = 0.001, CI 0.05, N = 11,  $p = 0.96$ , t-test).  
**H:** Example spatial map of polarization-selectivity index (PSI) in MeTu terminals in the AOTU (R56F07-Gal4>sytGCaMP6s; predominantly MeTu<sub>il</sub> neurons innervating intermediate-lateral (il) domain, with smaller proportion of MeTu<sub>im</sub> innervating lateral-anterior (la) domain, see A''). Arrowhead indicates medial region of population with low PSI values cf. average activity in J.  
**I:** Example spatial map of PSI in MeTu terminals in the AOTU for an alternative driver (R73C04-Gal4>sytagCaMP6s; predominantly MeTu<sub>l</sub> neurons innervating lateral (l) domains, with smaller proportion of MeTu<sub>il</sub> innervating intermediate-lateral (il) domain, see Fig. 3G').  
**J:** Example polarization tuning map for above-threshold pixels in R56F07 MeTu neurons from the example recording in I.  
**K:** As in J, for R73C04 MeTu neurons from the example recording in I.  
**L:** Scatter plot showing the predominant polarotopic organization of R56F07 MeTu neurons. Individual points represent pixels recorded in MeTu neurons, showing their normalized vertical position in the MEDRA and their preferred angle of polarization (AoP). Line shows fit for all pooled data ( $p = 0.68$ , N = 7 animals,  $p < 10^{-6}$  permutation test).  
**M:** As in L, for R73C04 MeTu neurons ( $p = 0.58$ , N = 10 animals,  $p < 10^{-6}$  permutation test).

We recorded presynaptic calcium signals in the AOTU for the two MeTu drivers in response to rotations of the polarizer, as in Fig. 1. In both MeTu populations, we found broader PSI distributions (Fig.

2F) than in the DmDRA1 neurons recorded in the MEDRA (Fig. 1E). Nonetheless, compared to control experiments with the polarizer removed, the polarizer caused a statistically significant



348 increase in average PSI values in both MeTu distributions (Fig.  
349 2G). We observed that the highest PSI values were spatially  
350 restricted to a vertical band within the AOTU (Fig. 2H,I), indicating  
351 that MeTu terminals which were strongly modulated by the  
352 polarization stimulus occupied a common region, while adjacent  
353 regions contained terminals which were generally modulated less.  
354 We surmise that these regions of differing polarization-sensitivity  
355 result from each population containing a combination of MeTu  
356 neurons with dendrites contacting the MEDRA, which constitutes  
357 only around 5% of medulla columns (Weir et al., 2016), and  
358 neurons with dendrites outside the MEDRA. We also note the  
359 proportion of PSI values below 0.5 was slightly lower in the  
360 population containing neurons with dendrites in the dorsal medulla  
361 only (R56F07) compared to the ventral and dorsal population  
362 (R73C04) (Fig. 2F,H,I). In R56F07, the most responsive MeTu  
363 terminals were found within the most lateral regions of the  
364 population in the AOTU (Fig. 2H, Fig. S3E). In R73C04, the most  
365 responsive terminals tended to be clustered in a narrow medial  
366 band of the population (Fig. 2I, Fig. S3F), likely corresponding to  
367 the anterior region of AOTU<sub>ii</sub> and possibly AOTU<sub>ia</sub>.

368 Based on the polarotopic organization of R7/R8 and DmDRA1  
369 in the MEDRA, as well as the mapping of MEDRA to AOTU by  
370 MeTu neurons (Fig. 2E), we predicted that polarization-sensitive  
371 MeTu neurons would exhibit a counter-clockwise shift in their  
372 preferred AoP from ventral to dorsal in the right AOTU. To assess  
373 this, we examined pixels with above-threshold PSI values (>1 SD  
374 greater than the mean background value, see Methods), which  
375 limited the analysis to polarization-sensitive MeTu terminals (Fig.  
376 2J,K). Across animals, both populations showed a predominant  
377 polarotopic organization which matched our prediction: from  
378 ventral to dorsal in the right AOTU, the preferred AoP shifted  
379 counter-clockwise (Fig. 2L,M). This polarotopy is consistent with  
380 MeTu neurons receiving polarized light responses from either  
381 DmDRA1 or DRA R7 in the MEDRA and conveying them to the  
382 AOTU with the positional mapping we identified (Fig. 2D,E).  
383 Consistent with this mapping, we observed no clear relationship  
384 between preferred AoP and horizontal position (Fig. S3E,F).  
385 However, we observed vertical organizations of responses which  
386 deviated from the norm in approximately 20% of recordings across  
387 both drivers. The most common of these resembled an inverted  
388 form of the predominant polarotopy (from ventral to dorsal in the  
389 right AOTU, the preferred AoP rotated clockwise) and also typically  
390 contained tunings to a different range of AoPs than the  
391 predominant organization (Fig. S3I,I'). Although we could not  
392 determine why one organization was observed over another, this  
393 finding suggests that a further transformation of MeTu responses  
394 may take place. However, a reversed mapping of responses could  
395 be achieved by combining signals originating from the contralateral  
396 eye (Fig. S1G,H), which we explore below.

### 397 **Visual features encoded in the AOTU and bilateral** 398 **interactions**

399 We wondered whether functional divisions of MeTu responses  
400 exist within the AOTU, which might contain different polarotopic  
401 organizations or spatially segregated responses to unpolarized  
402 visual features not mediated by the MEDRA. We first examined the  
403 spatial organization of polarized light responses in regions which  
404 contained low or below-threshold PSI values in the previous  
405 experiment (Fig. 2I,K). Within lateral MeTu terminals in R73C04  
406 likely occupying the ventral AOTU<sub>ic</sub> domain (green ROIs, Fig. 3A),  
407 we found moderate modulation of activity during the rotation of the  
408 polarizer (Fig. 3B). Similar to the terminals with above-threshold

409 PSI values (Fig. 2K), we observed a vertical polarotopic  
410 organization consistent with the anatomical mapping of MeTu  
411 neurons (Fig. S3B–D): in a dorsal direction, the AoP rotated  
412 counter-clockwise in the right AOTU and clockwise in the left  
413 AOTU (Fig. 3C). We then recorded MeTu responses to  
414 unpolarized, small-field vertical bar stimuli at different positions in  
415 the visual field (Fig. 3D). Within an intermediate band of MeTu  
416 terminals likely corresponding to AOTU<sub>ia</sub> (blue ROIs, Fig. 3A), we  
417 observed clear responses to bars in ipsilateral-frontal and frontal  
418 positions, with the more frontal position represented dorsally in the  
419 AOTU on both sides of the brain (Fig. 3D). In the ventral AOTU,  
420 we consistently found responses to bars presented in the  
421 contralateral-lateral visual field ( $\pm 90^\circ$  azimuth), outside the field of  
422 view of the ipsilateral eye (Fig. 3D,E). Together, these results  
423 suggest that the AOTU contains retinotopic representations of  
424 visual space and angles of polarization within different regions  
425 (Fig. 3C,E). Furthermore, these regions do not appear to be  
426 mutually exclusive, as we occasionally observed responses to both  
427 polarized and unpolarized stimuli at the same location (green  
428 trace, Fig. 3D'). For example, MeTu terminals in regions which  
429 were modulated by the polarizer (green ROIs, Fig. 3A) also  
430 responded to a wide-field optic-flow pattern presented at different  
431 locations (Fig. 3F), further highlighting the range of visual features  
432 represented in a particular region of the AOTU.

433 Evidence from other insects suggested that we might find  
434 bilateral, inter-tubercle neurons which, if in contact with MeTu  
435 neurons, could be conveying the responses we observed in the  
436 AOTU to contralateral stimuli (Heinze et al., 2013; Pfeiffer and  
437 Kinoshita, 2012; Pfeiffer et al., 2005). We used the MeTu driver  
438 R73C04-Gal4 to drive *trans*-Tango and reveal putative  
439 postsynaptic neurons in the AOTU (Fig. 3G). We found clear  
440 labeling of a population of neurons projecting to the bulb which  
441 resembled the tubercular-bulbar (TuBu) neurons (Omoto et al.,  
442 2017) (Fig. 3G'), in addition to labeling of the inter-tubercle tract  
443 (ITT) (Strausfeld, 1976) (Fig. 3G''), suggesting inter-hemispheric  
444 signalling postsynaptic to MeTu neurons in the AOTU. We then  
445 identified a Gal4 driver (R17F12-Gal4) that is expressed in a  
446 population of two tubercular-tubercle (TuTu) neurons per brain  
447 hemisphere, with axonal projections to the contralateral AOTU via  
448 the ITT (Fig. 3H). Within the AOTU, these TuTu neurons  
449 predominantly innervate the intermediate-lateral domain (AOTU<sub>ii</sub>)  
450 (Fig. 3H'). We recorded presynaptic calcium activity in the  
451 terminals of contralateral TuTu neurons in the AOTU (Fig. 3I,J).  
452 Unexpectedly, we did not find responses to the unpolarized bar  
453 stimuli at any of the positions tested (Fig. 3I), indicating that these  
454 TuTu neurons likely do not mediate the contralateral responses we  
455 observed in the MeTu neurons (Fig. 3D). Rather, we found that the  
456 TuTu neurons were polarization-sensitive with PSI values similar to  
457 those of the MeTu neurons (Fig. 3K,L), and tunings to a limited  
458 range of polarization angles ( $\sim 30^\circ$ ) centered around a  
459 near-horizontal orientation (Fig. 3L,M). Therefore, the anatomy,  
460 polarization-sensitivity, and number of TuTu neurons suggests that  
461 they may correspond to the TuTu1 neurons described in locusts,  
462 although their preferred AoPs differ (Pfeiffer et al., 2005). TuTu1  
463 neurons in the locust have also been shown to respond to  
464 unpolarized visual stimuli, however their responses were also  
465 selective for both spatial position and color, and the unpolarized  
466 stimuli presented here are not directly comparable (Pfeiffer and  
467 Homberg, 2007). The specificity of TuTu1 responses is thought to  
468 reflect their role in time-compensated processing of polarized light  
469 signals and the integration of information about the position of the  
470 sun and spectral content of the sky.

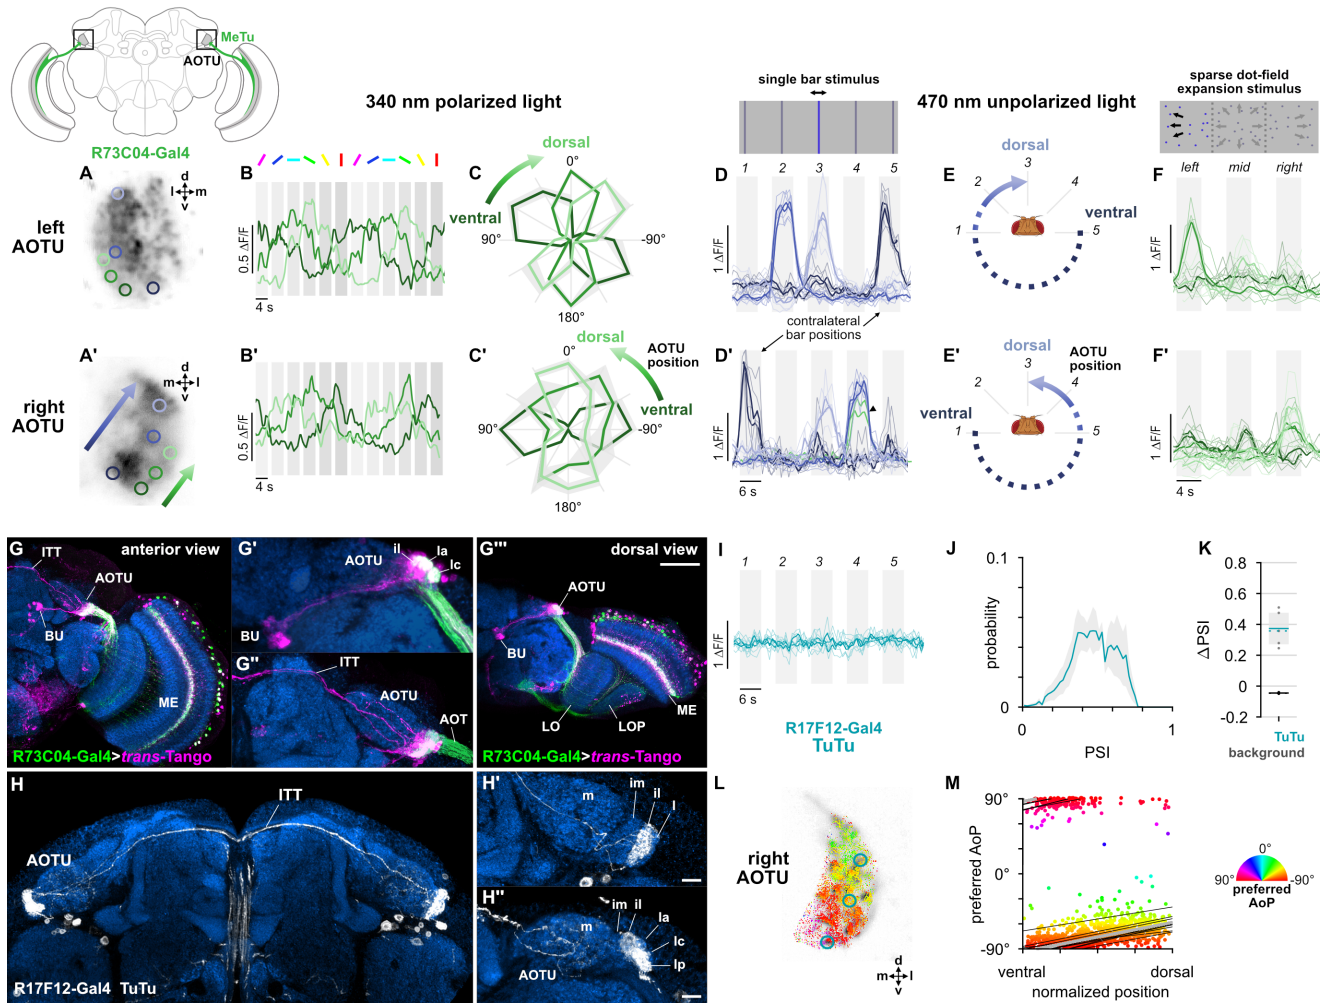

471 **Figure 3: Visual features encoded in the AOTU and bilateral interactions**

472 **A:** Example time-averaged maximum-intensity projection showing GCaMP activity in R73C04 neurons in the AOTU and examples of lateral ROIs (green) and medial ROIs (blue) (R73C04-Gal4>sytGCaMP6s).  
 473 **B:** GCaMP activity in lateral MeTu neurons showing responses to different angles of polarization. Each trace shows the mean of ROIs at equivalent positions in three different animals (one ROI per animal).  
 474 **C:** Normalized tuning curves for responses shown in B. Mean  $\pm$  SEM.  
 475 **D:** Responses of MeTu neurons in medial positions to an unpolarized blue bar oscillating in five positions in the frontal visual field. Traces of the same color are from ROIs in equivalent positions in the AOTU in three different animals, thick traces show their mean. Bar positions 1 and 5 correspond to  $\pm 90^\circ$  azimuth in the contralateral visual field for recordings in the right (D') and left (D) AOTU, respectively. Arrowhead in D' indicates the response of an ROI in a lateral position (green) with similar responses to the bar stimulus.  
 476 **E:** Proposed mapping of azimuthal position in visual field to vertical position in AOTU, based on D.  
 477 **F:** Responses of MeTu neurons in lateral positions to a sparse dot-field expansion pattern presented in three regions of the frontal visual field. Traces of the same color are from ROIs in equivalent positions in the AOTU in three animals, thick traces show their mean.  
 478 **G:** Confocal projection (anterior view) of *trans-Tango* signal (magenta) labeling putative postsynaptic partners of R73C04-Gal4 MeTu neurons (green). **G':** High magnification dorsal view highlighting TuBu neurons projecting from AOTU to bulb (BU). **G'':** High magnification anterior view highlighting projections to contralateral AOTU. **G''':** Dorsal view. Scale bar denotes 50  $\mu$ m.  
 479 **H:** Confocal projection (anterior view) of TuTu neuron expression pattern (R17F12-Gal4>GFP). High magnification anterior (**H'**) and dorsal (**H''**) views. Scale bars denote 10  $\mu$ m.  
 480 **I:** As in D, for TuTu neurons.  
 481 **J:** Probability distribution of PSI values in TuTu neurons (average PSI TuTu: 0.48, CI 0.12, N = 5 animals). Mean  $\pm$  CI.  
 482 **K:** Effect of polarizer on median PSI values versus controls with polarizer removed, within TuTu neurons (light dots) and background regions (dark dots) in individual animals (TuTu, blue line: mean  $\Delta$ PSI = 0.34, CI 0.12, N = 5,  $p = 0.02$  t-test; background, black line: mean  $\Delta$ PSI = -0.045, CI 0.05, N = 5,  $p < 10^{-4}$  t-test).  
 483 **L:** Example polarization tuning map for above-threshold pixels in the terminals of R17F12 TuTu neurons in a single imaging plane (R17F12-Gal4>sytGCaMP6s).  
 484 **M:** Scatter plot showing the predominant polarotopic organization of R17F12 TuTu neurons. Thin lines show linear-circular fits for data from individual animals with significant correlations (mean  $\rho = 0.65$ , SEM 0.06, N = 5 animals), thick line shows fit for all pooled data ( $\rho = 0.56$ , N = 5 recordings,  $p < 10^{-6}$  permutation test).

494 **A population of TuBu neurons receives polarized light signals in the AOTU**

495 Next, we focused on the TuBu neurons and asked whether they receive polarization signals in the lateral (l) and intermediate-lateral (il) domains of the anterior optic tubercle (AOTU), as suggested by *trans-Tango* labeling from polarization-sensitive MeTu neurons (Fig. 3G). We examined three populations of TuBu neurons, grouped according to the region of the bulb (BU) they project to: superior (TuBu<sub>s</sub>), inferior (TuBu<sub>i</sub>), and anterior (TuBu<sub>a</sub>) (Fig. 4A). The dendrites of TuBu neurons in each population have also been shown to predominantly innervate

495 stereotypical domains of the AOTU (Omoto et al., 2017) (Fig. 4A).  
 496 We recorded calcium activity using Gal4 drivers for each population, noting that the driver for superior bulb-projecting TuBu<sub>s</sub> neurons (R88A06-Gal4) is also expressed in TuBu<sub>a</sub> neurons.  
 497 Among the dendrites of TuBu neurons recorded in the AOTU, we found that the populations innervating the AOTU<sub>i</sub> and AOTU<sub>l</sub> domains (TuBu<sub>s</sub> and TuBu<sub>a</sub>, respectively) contained high PSI values that indicated strong modulation by the polarizer (Fig. 4B), with average values significantly higher than the background regions of recordings (Fig. 4C). In contrast, dendrites innervating the AOTU<sub>im</sub> domain (TuBu<sub>i</sub>) contained PSI values not greater than

0.5 (Fig. 4B) and, on average, were indistinguishable from background regions (Fig. 4C). We typically found very few pixels with above-threshold PSI values in recordings of TuBu<sub>i</sub> dendrites (Fig. 4D) and across all recordings we did not find a common relationship between the preferred angle of polarization (AoP) of TuBu<sub>i</sub> neurons and their ventral-dorsal position within AOTU<sub>im</sub> (Fig. 4E).

Within the joint population of TuBu<sub>s</sub> and TuBu<sub>a</sub> neurons (R88A06-Gal4), the lateral domain (AOTU<sub>l</sub>) containing TuBu<sub>s</sub> dendrites typically exhibited a mixture of below-threshold PSI values and a smaller proportion of above-threshold values (Fig. 4F), whereas the more-medial AOTU<sub>il</sub> domain containing TuBu<sub>a</sub> dendrites consistently showed above-threshold PSI values (Fig. 4F). Pooling data from both domains, the preferred AoP covered a range of angles from -90° to +90° and we found a common relationship between preferred AoP and ventral-dorsal position within the AOTU (Fig. 4G). Correspondingly, dendritic regions

specifically within the population of TuBu<sub>a</sub> neurons (R34H10-Gal4) contained entirely above-threshold PSI values (Fig. 4H) and obeyed the same polarotopic organization (Fig. 4I).

For the dendrites of TuBu<sub>a</sub> and TuBu<sub>s</sub> neurons, we found that the direction of polarotopy in the AOTU (a counter-clockwise rotation of preferred AoP from ventral to dorsal) matched the polarotopy in the putatively presynaptic MeTu neurons. However, the relative positions of tunings along the ventrodorsal axis of the AOTU do not correspond directly. For example, in the dorsal half of the AOTU the preferred AoPs of MeTu terminals were in the range 0° to +90° (Fig. 2L,M), whereas for TuBu<sub>a</sub> dendrites in the dorsal half of the AOTU preferred AoPs were in the range -90° to 0° (Fig. 4I). If MeTu neurons are indeed presynaptic to TuBu neurons in the AOTU, this result suggests either inhibitory input from MeTu neurons, which would effectively shift the preferred AoP by 90°, or the integration of additional inputs from unidentified polarization-sensitive elements at TuBu dendrites.

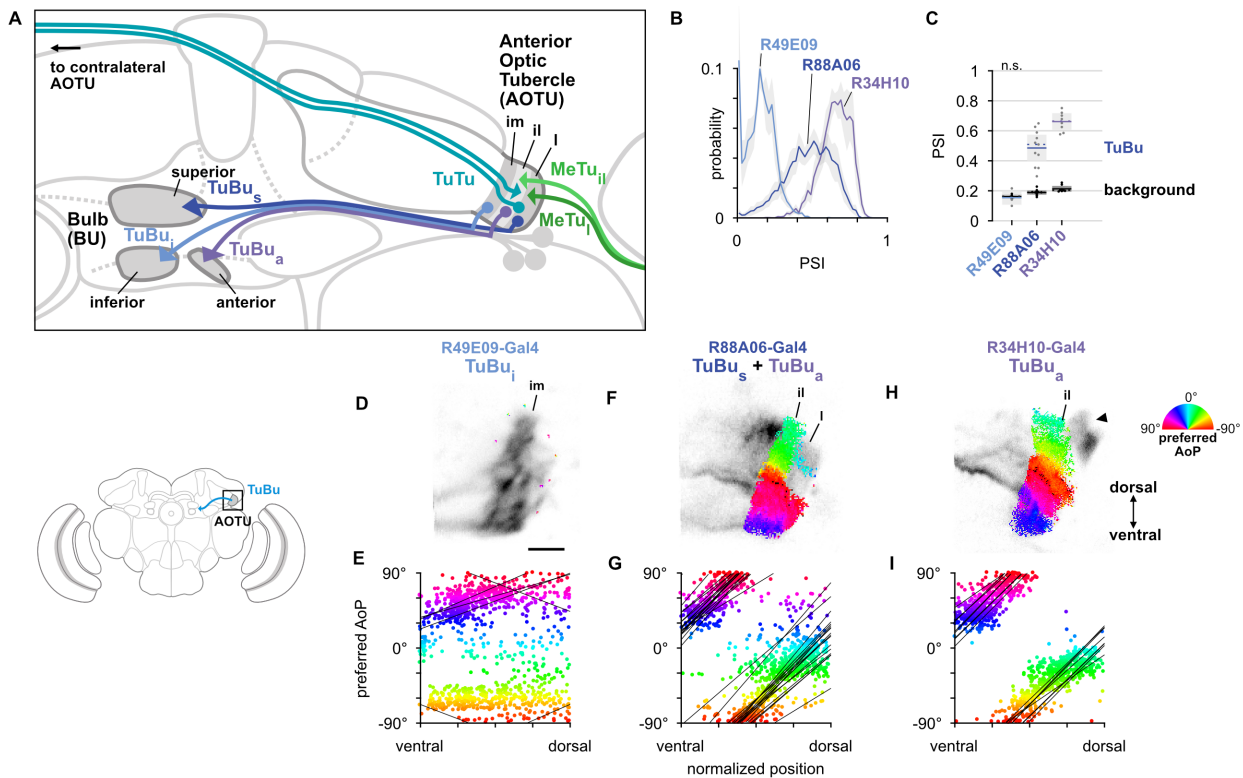

550 **Figure 4: A population of TuBu neurons receives polarized light signals in the AOTU**

551 **A:** Schematic of TuBu neuron types projecting to the bulb (BU) and connectivity in the AOTU.

552 **B:** Probability distribution of PSI values in TuBu neurons recorded in the AOTU. Mean  $\pm$  CI. Summarized in **C**.

553 **C:** Average PSI values within TuBu neurons (light dots) and background regions (dark dots) in individual animals (TuBu<sub>i</sub> neurons: 0.15, CI 0.04, background: 0.16, CI 0.14, N = 5  
554 animals,  $p = 0.76$  t-test; TuBu<sub>s</sub> + TuBu<sub>a</sub> neurons: 0.49, CI 0.12, background: 0.19, CI 0.02, N = 11 animals,  $p < 10^{-4}$  t-test; TuBu<sub>a</sub> neurons: 0.67, CI 0.06, background: 0.21, CI 0.02, N = 5  
555 animals,  $p < 10^{-8}$  t-test). Shaded box denotes Bonferroni corrected 95% confidence interval.

556 **D:** Example polarization tuning map for above-threshold pixels in the dendrites of TuBu<sub>i</sub> neurons in a single imaging plane (R49E09-Gal4>GCaMP6s). Below-threshold pixels display  
557 average intensity in grayscale. Scale bar denotes 5  $\mu$ m.

558 **E:** Scatter plot showing the lack of polarotopic organization in TuBu<sub>i</sub> neurons. Individual points represent pixels recorded from TuBu neurons, showing their normalized vertical position in  
559 the AOTU and their preferred angle of polarization (AoP). Thin lines show linear-circular fits for data from individual animals with significant correlations (mean individual  $\rho = 0.28$ , SEM  
560 0.29, N = 4 animals; pooled data  $\rho = 0.19$ , N = 5 recordings,  $p < 10^{-6}$  permutation test).

561 **F:** As in **D**, for a population containing TuBu<sub>s</sub> and TuBu<sub>a</sub> neurons (R88A06-Gal4>GCaMP6s).

562 **G:** As in **E**, for the common polarotopic organization in TuBu<sub>s</sub> and TuBu<sub>a</sub> neurons (mean individual  $\rho = 0.63$ , SEM 0.21, N = 11 animals; pooled data  $\rho = 0.09$ , N = 11 recordings,  $p < 10^{-8}$   
563 permutation test).

564 **H:** As in **D**, for TuBu<sub>a</sub> neurons (R34H10-Gal4>GCaMP6s). Arrowhead indicates cell bodies excluded from analysis.

565 **I:** As in **E**, for the common polarotopic organization in TuBu<sub>a</sub> neurons (mean individual  $\rho = 0.51$ , SEM 0.32, N = 8 animals; pooled data  $\rho = 0.64$ , N = 8 recordings,  $p < 10^{-6}$  permutation  
566 test).

### 567 The anterior bulb is an entry point for polarized light signals 568 into the central complex

569 We next asked how responses of TuBu neurons are organized in  
570 the bulb (BU). As in other insects, the BU features giant synapses  
571 ('micro-glomeruli') formed by TuBu endings and their targets, the

572 ring neurons. In *Drosophila*, the BU consists of three anatomical  
573 regions: superior (BUs), inferior (BUi), and anterior (BUa) (Fig. 4A).  
574 We recorded presynaptic calcium activity in the micro-glomerular  
575 terminals of TuBu neuron populations that target each region. We  
576 first examined the prevalence of polarization-modulated activity,



577 indicated by the polarization-selectivity index (PSI). Spatial maps  
578 of PSI values revealed that the majority of TuBu<sub>s</sub> neurons recorded  
579 in micro-glomeruli in the BUs contained low PSI values, and  
580 interspersed among them were micro-glomeruli with high PSI  
581 values (Fig. 5A). The mixture of polarization-sensitive and  
582 insensitive micro-glomeruli is conveyed by the broad distribution,  
583 skewed towards zero, of PSI values found across all pixels  
584 recorded in the BUs (Fig. 5B). In contrast, the narrow distribution

585 of PSI values close to zero in BUi micro-glomeruli demonstrates  
586 the absence of polarization-sensitive TuBu<sub>i</sub> neurons (Fig. 5B).  
587 Finally, we found that all TuBu<sub>a</sub> neurons recorded exhibited high  
588 PSI values in the BUa (Fig. 5A,B), in two Gal4 drivers. Average  
589 PSI values in the BUa were greater than 0.5 in both drivers (Fig.  
590 5C), while in the BUi and BUs, the average PSI values were not  
591 significantly different from the average in background regions of  
592 recordings, typically around 0.2 (Fig. 5C).

593 **Figure 5: The anterior bulb is an entry point for polarized**  
594 **light signals into the central complex**

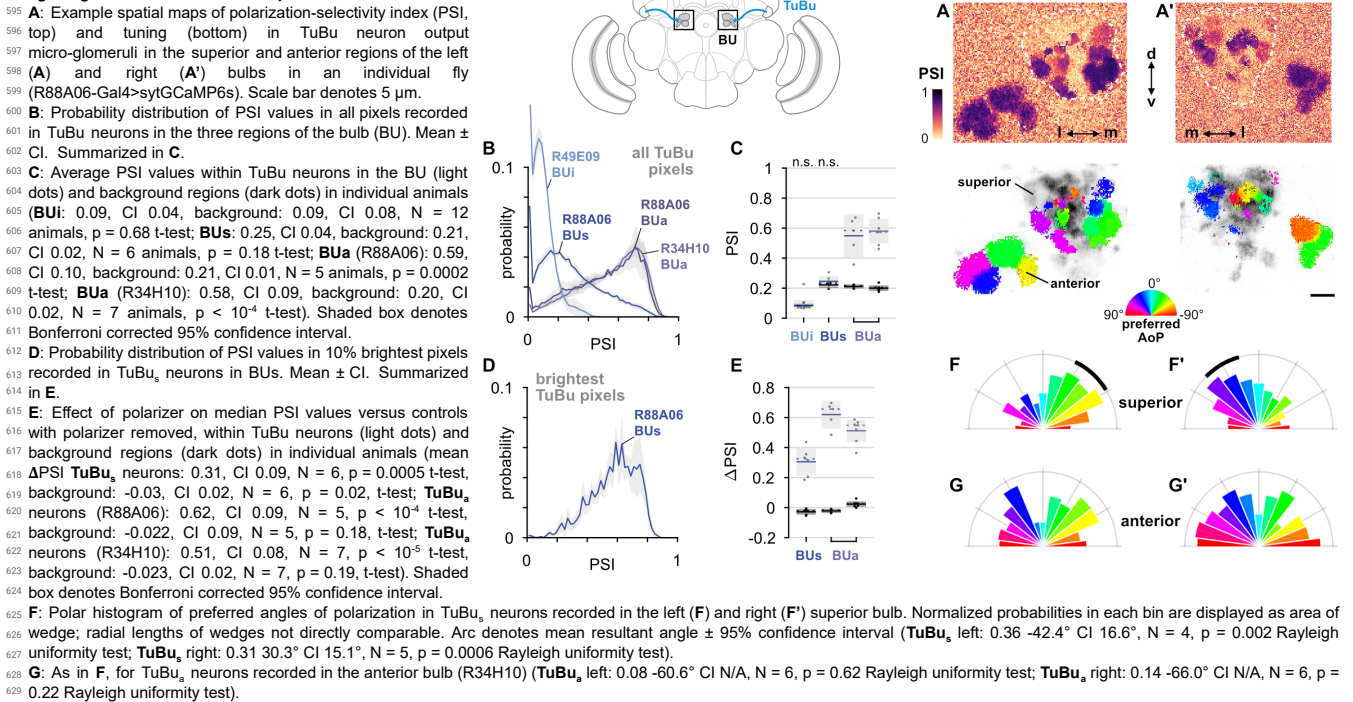

630 We further explored the PSI values in the BUs by isolating the  
631 brightest pixels in TuBu<sub>s</sub> neurons in each recording, which were  
632 likely to represent active neurons (Fig. 5D). We found that the  
633 distribution of PSI values among the brightest pixels was shifted  
634 towards one and was qualitatively different to the distribution  
635 across all pixels (Fig. 5B,D). We then compared the average PSI  
636 value of the brightest pixels in the BUs with their average value in  
637 control experiments with the polarizer removed, and repeated this  
638 procedure with the brightest pixels in the BUa as a reference.  
639 Among active pixels in both the BUs and BUa we found a  
640 significant effect of the polarizer on PSI values versus controls,  
641 with the effect size larger in the latter (Fig. 5E). In sum, we found  
642 polarized light responses in TuBu neuron output micro-glomeruli in  
643 both the superior and anterior bulb, and no appreciable responses  
644 to polarized light in TuBu neuron outputs in the inferior bulb. We  
645 interpret these findings as being consistent with the corresponding  
646 dendritic responses of TuBu neurons in the AOTU (Fig. 4B).

647 We then asked whether the information about polarized light  
648 available in the BUs and BUa differed in some way, for example by  
649 encoding different ranges of angles. We observed that a cluster of  
650 micro-glomeruli towards the medial edge of the superior bulb  
651 tended to show preferential responses to similar angles of  
652 polarization (AoP) (Fig. 5A, bottom). When we examined the  
653 distribution of preferred AoPs in the BUs we found a non-uniform  
654 distribution with the highest frequency of preferred AoPs around  
655 -45° in the left bulb (Fig. 5F) and +45° in the right bulb (Fig. 5F'). In  
656 the anterior bulb (BUa) on both sides, we found an approximately

657 uniform representation of preferred AoPs in TuBu<sub>s</sub> neurons (Fig.  
658 5G, G'). We expected that a uniform representation of the full  
659 range of polarization space would be necessary for decoding  
660 heading direction from skylight polarization patterns. The  
661 over-representation of certain AoPs in BUs micro-glomeruli  
662 resembles a detector for a particular feature, such as horizontally  
663 polarized reflections from the surface of water, rather than the  
664 main input to a system for polarized light-based navigation. Upon  
665 inspection, we did not see a clear linear organization of preferred  
666 AoPs in either the BUs or the BUa, a marked contrast to the  
667 consistent organization in TuBu dendrites in the AOTU (Fig. 4H,I).  
668 Circular organizations of TuBu neurons in the bulb have been  
669 proposed (Timaeus et al., 2017) and we explore these in the BUa  
670 in the next section (Fig. S5).

671 TuBu neurons have previously been shown to respond to  
672 unpolarized visual stimuli presented to regions of the eye outside  
673 the DRA (Omoto et al., 2017; Shiozaki and Kazama, 2017; Sun et  
674 al., 2017). To compare the responses of the three groups of TuBu  
675 neurons, we presented a wide-field flash of unpolarized blue light  
676 and recorded responses in each population in the AOTU and BU  
677 (Fig. S4A). TuBu<sub>s</sub> and TuBu<sub>i</sub> neuron populations showed  
678 responses to the flash in the AOTU and, more strongly, in the BU,  
679 while TuBu<sub>a</sub> neurons recorded in either neuropil were inhibited by  
680 the unpolarized light stimulus (Fig. S4). We note that prior work  
681 appeared to show excitation of BUa micro-glomeruli in response to  
682 unpolarized small-field stimuli presented in the contralateral visual  
683 field and inhibition in response to ipsilateral stimuli (Shiozaki and

684 Kazama, 2017). These results may reflect excitatory and inhibitory  
685 receptive fields of TuBu<sub>s</sub> neurons, while our recordings indicate  
686 that inhibition dominates the response of the population to  
687 wide-field visual stimuli.

#### 688 R4m ring neurons receive polarization-tuned responses from 689 TuBu neurons

690 Taken together, our recordings of TuBu neurons indicate that  
691 polarized light signals are potentially delivered to the central  
692 complex via two parallel pathways: one through the superior bulb  
693 (BUs), containing a limited representation of polarization space in  
694 addition to other visual information, and a second channel through  
695 the anterior bulb (BUa). In the bulb, TuBu neuron presynaptic  
696 terminals innervate the globular dendrites of ring neurons in a  
697 largely one-to-one fashion, forming individual micro-glomeruli. Ring  
698 neurons project medially to the ellipsoid body (EB) (Fig. 6A), where  
699 their arborizations have a circular form and are both dendritic and  
700 axonal (Fig. 6B) (Hanesch et al., 1989; Omoto et al., 2018). We  
701 recorded calcium activity in the dendrites of two populations of ring  
702 neurons in the bulb, one innervating the medial two-thirds of the  
703 BUs (R2; R19C08-Gal4) and one innervating the BUa (R4m;  
704 R34H10-Gal4) (Fig. 6A). Both R2 and R4m ring neuron  
705 populations target the outer central domain of the EB, albeit  
706 following different trajectories (Fig. 6A,B) (Omoto et al., 2017,  
707 2018).

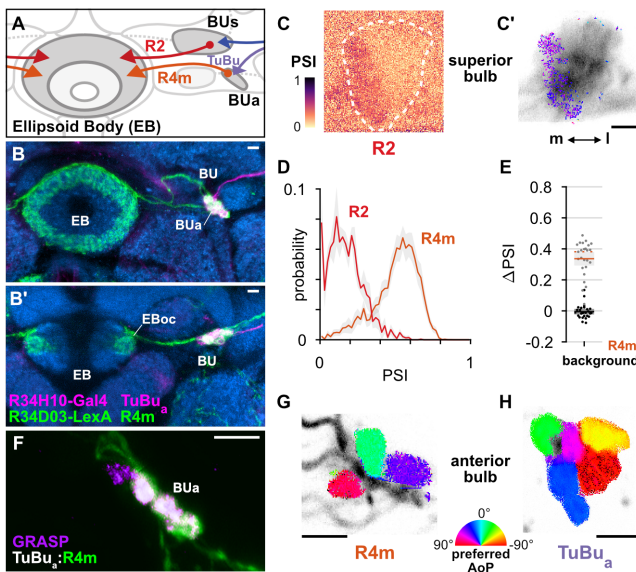

708 **Figure 6: R4m ring neurons receive polarization-tuned responses from TuBu**  
709 **neurons**  
710 **A:** Schematic of TuBu and ring neuron connectivity in the bulb (BU).  
711 **B:** Confocal projection (anterior view) of dual-labeled TuBu<sub>a</sub> neurons  
712 (R34H10-Gal4>RFP, magenta) and R4m neurons (R34D03-Gal4>GFP, green). **B':**  
713 Dorsal view. Scale bars denote 5  $\mu$ m.  
714 **C:** Example spatial maps of polarization-selectivity index (PSI) and tuning (**C'**) for R2  
715 dendrites recorded in the superior bulb (R19C08-Gal4>GCaMP6s). Scale bar denotes  
716 5  $\mu$ m.  
717 **D:** Probability distributions of PSI values in ring neurons recorded in the bulb (average  
718 PSI R2 neurons: 0.17, CI 0.05, background: 0.20, CI 0.03, N = 4 animals, p = 0.29 t-test;  
719 R4m neurons: 0.51, CI 0.11, background: 0.22, CI 0.05, N = 25 animals, p < 10<sup>-8</sup> t-test).  
720 Mean  $\pm$  CI.  
721 **E:** Effect of polarizer on median PSI values versus controls with polarizer removed, within  
722 R4m neurons (light dots) and background regions (dark dots) in individual animals (mean  
723  $\Delta$ PSI R4m neurons: 0.34, CI 0.11, N = 25, p < 10<sup>-8</sup> t-test, background: -0.05, CI 0.05, N =  
724 25, p = 0.58, t-test).  
725 **F:** Confocal projection (anterior view) of activity-dependent synaptic GRASP (GFP  
726 reconstitution across synaptic partners) signal between presynaptic TuBu<sub>a</sub> and  
727 postsynaptic R4m neurons in the anterior bulb (BUa) (Macpherson et al., 2015). Scale  
728 bar denotes 5  $\mu$ m.  
729 **G:** Example polarization tuning map in R4m dendrites in BUa  
730 (R34D03-Gal4>GCaMP6s). Pixels falling outside an ROI drawn around the neurons of  
731 interest, show average intensity in grayscale. Individual axons projecting medially to the  
732 EB are visible leaving the left side of the image. Scale bar denotes 5  $\mu$ m.  
733 **H:** As in **G**, for TuBu<sub>a</sub> output micro-glomeruli at an approximately corresponding location  
734 in BUa (R34H10-Gal4>syGCaMP6s).

735 As with TuBu<sub>s</sub> micro-glomerular outputs, we found that only a  
736 subset of R2 neurons in the BUs were modulated by polarized  
737 light, with above-threshold PSI values typically in a medial cluster  
738 with a preferred angle of polarization (AoP) around 45° (Fig. 6C).  
739 Low PSI values were common throughout the R2 population and  
740 average values were not significantly different from average values  
741 in background regions (Fig. 6D). By contrast, in R4m neurons in  
742 the BUa, average PSI values were greater than 0.5 and the overall  
743 distribution of values in the population was similar in shape to the  
744 distribution in TuBu<sub>a</sub> neurons (Fig. 4B, Fig. 5B, Fig. 6D). We found  
745 that the polarizer had a significant effect on PSI values of R4m  
746 neurons versus controls with the polarizer removed (Fig. 6E).  
747 Furthermore, we found that the dendrites of individual R4m  
748 neurons exhibited distinct preferences for AoP in each recording  
749 (Fig. 6G). Since R4m neurons appear to receive monosynaptic  
750 input from TuBu neurons, we conclude that they almost certainly  
751 acquire their polarization-tuned responses from the presynaptic  
752 TuBu<sub>a</sub> neurons in the BUa (Fig. 6A,B,F). We note that the average  
753 PSI value decreased from TuBu<sub>a</sub> neurons to R4m neurons (Fig.  
754 S5) and we further explore the transformation of their signals in the  
755 next section. Although the BUs appears to contain  
756 polarization-sensitive elements, they are pervasive neither in the  
757 populations of R2 neurons nor their putative presynaptic partners,  
758 TuBu<sub>s</sub> neurons, and hereafter we focus on polarization processing  
759 in the BUa.

760 In contrast to the linear polarotopic organization of tunings  
761 observed in the AOTU, which was consistent across animals (Fig.  
762 4F,H), the spatial organization of polarization tunings in the BUa  
763 was less clear (Fig. 6G,H). We tested whether there was a  
764 common relationship between the horizontal (medial-lateral),  
765 vertical (ventral-dorsal), or angular position of micro-glomeruli  
766 within the BUa and their preferred AoP, for both TuBu<sub>a</sub> and R4m  
767 neurons (Fig. S5). We also considered whether there was a  
768 relationship within a population of neurons in an individual animal  
769 which was not common across animals. We found no indication of  
770 a relationship between position and preferred AoP except in  
771 recordings of TuBu<sub>a</sub> neurons in the left BUa, which showed a  
772 common vertically organized polarotopy (Fig. S5B) and circularly  
773 organized polarotopies in individual animals (Fig. S5C). However,  
774 we found no significant polarotopy in the corresponding TuBu<sub>a</sub>  
775 neurons in the right BUa, or in postsynaptic R4m neurons. Hence  
776 we cannot firmly conclude that either a vertical or circular  
777 organization of tunings exists in the anterior bulb. Furthermore, our  
778 assessment of circular organization is only valid for the  
779 dorso-posterior imaging plane used here, and we cannot exclude  
780 the possibility of a circular organization around a different axis of  
781 the bulb.

#### 782 Populations of R4m ring neurons exhibit a preferred angle of 783 polarization

784 We next wanted to understand how polarized light signals are  
785 represented in the ellipsoid body (EB), where the tangential ring  
786 neurons supply visual information around its circular structure.  
787 Ring neurons interact bidirectionally with columnar neurons in  
788 each 'wedge' (Fig. S6B) (Omoto et al., 2018), which have been  
789 shown to flexibly encode heading direction relative to visual  
790 landmarks (Fisher et al., 2019; Kim et al., 2019; Seelig and  
791 Jayaraman, 2015). We recorded the synaptic terminals of a  
792 population of approximately ten R4m neurons (five per brain  
793 hemisphere) in the EB. As expected from recordings in the  
794 dendritic regions of R4m in the anterior bulb (BUa), we observed  
795 modulation of their activity with rotations of the polarizer, indicated

by their polarization-selectivity index (PSI) (Fig. 7A). Individual terminals were found to exhibit distinct tunings, and a range of tunings could be found intermingled at any given position in the EB (Fig. 7B). We noted here that in some recordings, above-threshold PSI values were spatially localized to approximately one quadrant of the EB (Fig. 7A,B, top). Additionally, we found that in many recordings the preferred angles of polarization (AoPs) of terminals were similar to each other within a recording, and the range of AoPs varied across animals (Fig. 7B). Therefore, the frequency of preferred AoPs was a unimodal distribution centered on a different angle in each recording (Fig. 7C). We verified that the non-uniform distribution of AoPs was not an artifact of our image projection across multiple planes and that a predominant preferred AoP was also observed from a single imaging plane through a section of the EB (Fig. 7A–C, bottom). As a result of these non-uniform tuning distributions, it followed that the average activity of the entire R4m population in the EB exhibited modulation induced by the polarizer and a single preferred AoP could effectively be identified for the population (Fig. 7D).

To compare the distribution of tunings across animals, we calculated the mean resultant vector of the tunings of all pixels within the EB, weighted by their individual PSI values (Fig. 7E). The length of the vector gives an indication of the distribution of polarization tunings in a single recording, with a value of 1 indicating an identical preferred AoP in all pixels and a value of zero indicating a uniform distribution of preferred AoPs. For R4m terminals in the EB we found population tuning vectors with

lengths exceeding 0.74 and an average length of 0.51 across animals (Fig. 7E), while for R4m dendrites recorded in either the left or right BUa individually we found an average length of 0.39 (Fig. 7F). For TuBu<sub>a</sub> populations recorded in either bulb we found that the vector lengths did not exceed 0.3 and the average length was 0.18 across animals (Fig. 7G). Since uneven sizes or quantities of neurons could affect these results, we repeated the analysis with ROIs drawn on individual micro-glomeruli in the bulb. We found a comparable number of micro-glomeruli in recordings of TuBu<sub>a</sub> and R4m neurons in the BUa, and the ROI- and pixel-based approaches both yielded a qualitatively similar result (Fig. 7F,G).

These findings suggest that there is not an exact correlation between polarized light responses in the populations of presynaptic TuBu<sub>a</sub> neurons and postsynaptic R4m neurons in an individual animal. In R4m dendrites, the average strength of modulation is reduced compared to TuBu<sub>a</sub> neurons (Fig. S5) and the distribution of tunings is less uniform (Fig. 7F,G). In R4m terminals in the EB, the distribution of tunings is less uniform still, hinting at subcellular processes which may impact R4m signalling locally in the EB, a computational motif for which there is precedence both in the CX and in visual neurons generally (Franconville et al., 2018; Turner-Evans et al., 2020; Yang et al., 2016). As a consequence, it appears that the ensemble activity of R4m synapses could convey a preferential response for a particular angle of polarization to columnar neurons at any location in the EB.

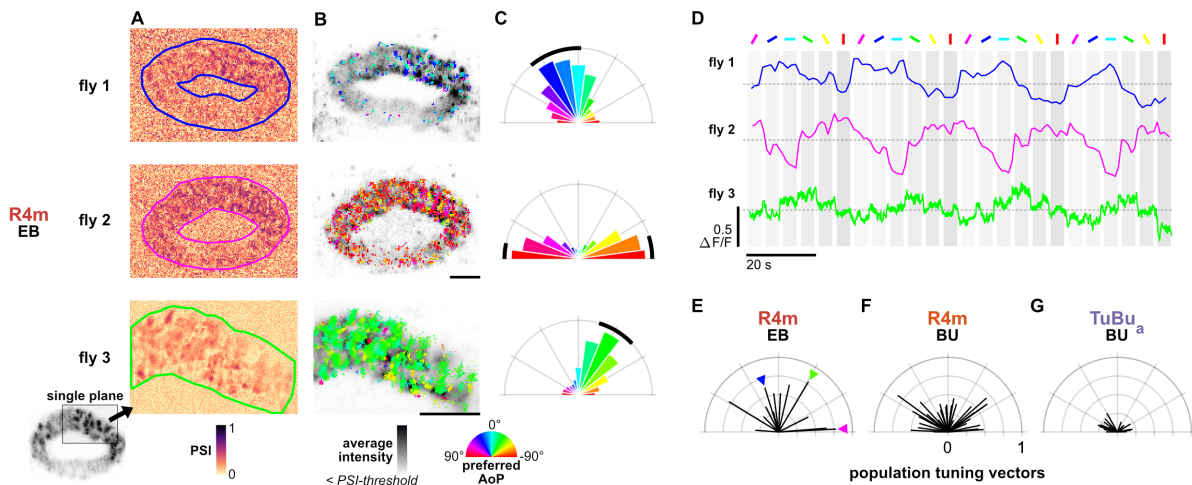

**Figure 7: Populations of R4m ring neurons exhibit a preferred angle of polarization**

**A:** Example spatial maps of polarization-selectivity index (PSI) in R4m synapses recorded in the ellipsoid body (EB) (R34D03-Gal4>sytGCaMP6s). Data shown are from maximum-selectivity projections through the EB (top, middle) or a single plane (bottom).

**B:** Example polarization tuning maps corresponding to recordings in **A**. Pixels with a below-threshold PSI value, or falling outside an ROI drawn around the R4m population, show average intensity in grayscale. Scale bars denote 10  $\mu$ m.

**C:** Polar histograms of preferred angles of polarization in all pixels within the ROIs in **A**. Normalized probabilities in each bin are displayed as area of wedge; radial lengths of wedges not directly comparable. Arc denotes mean resultant angle  $\pm$  95% confidence interval (**fly 1**: 0.57 18.7° CI 16.6°, N = 4, p = 0.002 Rayleigh uniformity test; **fly 2**: 0.72 -87.3° CI 15.0°, p = 0.001 Rayleigh uniformity test; **fly 3**: 0.71 -31.6° CI 15.4°, p = 0.001 Rayleigh uniformity test).

**D:** Average GCaMP activity in the ROIs in **A** in response to different angles of polarization.

**E:** Resultant tuning vectors for the population of all recorded R4m synapses in the EB of individual animals (mean length, pixel-based: 0.51, CI 0.44, N = 7, p < 10<sup>-6</sup> t-test). Arrowheads indicate data for examples in **A–D**.

**F:** Resultant tuning vectors for the population of all recorded R4m neurons recorded in the left or right BU of individual animals (mean length, pixel-based: 0.39, CI 0.32, N = 25, p < 10<sup>-6</sup> tailed t-test; ROI-based: 0.36, CI 0.46, N = 25, p = 0.005 tailed t-test, 134 ROIs, > 3 ROIs per BU).

**G:** Resultant tuning vectors for the population of all recorded TuBu<sub>a</sub> neurons recorded in the left or right BU of individual animals (mean length, pixel-based: 0.18, CI 0.13, N = 7, p < 10<sup>-6</sup> tailed t-test; ROI-based: 0.14, CI 0.15, N = 7, p = 0.0002 tailed t-test, 101 ROIs, > 3 ROIs per BU).

#### E-PG neurons respond to polarized light with flexible tuning and no fixed polarotopic map

We then asked whether columnar E-PG neurons (also referred to as ‘compass’ neurons) respond to polarized light cues. E-PG neurons are key elements in a network which maintains a neural

representation of heading direction as a locus of activity, or ‘bump’, which changes position within the CX as the animal turns, like the needle of a compass (Green et al., 2017; Seelig and Jayaraman, 2015). In the previous literature, this activity bump has been observed in the ellipsoid body (EB), protocerebral bridge (PB), and



fan-shaped body (FB), typically during walking or flight in restrained animals (Giraldo et al., 2018; Shiozaki et al., 2020). It has not been demonstrated in fully immobilized animals, hence we did not expect to see it here. Nevertheless, we hypothesized that E-PG activity could be modulated by a varying angle of polarized light since the same has been demonstrated in numerous columnar central complex neurons in other insects (Heinze and Homberg, 2007; Honkanen et al., 2019). Moreover, the responses we observed in R4m ring neurons (Fig. 7D) suggested that the E-PG population should also exhibit tunings to a limited range of angles. Ring neurons provide inhibitory input to E-PG neurons in the EB (Fig. 8A), where interactions between ring and E-PG neurons are thought to be reciprocal (Fisher et al., 2019; Kim et al., 2019; Omoto et al., 2018). Using activity-dependent GRASP (Macpherson et al., 2015), we found labeling of synapses between presynaptic E-PG neurons and postsynaptic R4m neurons in the EB (Fig. S6B), confirming the reciprocal connectivity between the neurons in the respective drivers (R4m: R34D03-LexA, Fig. 6B; E-PG: SS00096-Gal4, Fig. S6A).

We then recorded calcium signals in the presynaptic terminals of E-PG neurons in the PB, where they form 16 distinct glomeruli (Fig. 8A), each innervated by at least two E-PG neurons (Fig. S6) (Wolff et al., 2015). Due to their neighboring positions in the EB and connectivity with other neurons, the activity of E-PG neurons

innervating the 8 glomeruli in the left half of the PB is known to be coordinated with those in the 8 glomeruli in the right half (Fig. S6E), and on either side of the PB the ends are effectively wrapped (1L is continuous with 8L, 1R is continuous with 8R) (Giraldo et al., 2018; Green et al., 2017). We found that E-PG activity in the PB was modulated as the polarizer was rotated. We assigned PSI values to the pixels in each recording as an indicator of modulation (Fig. 8B) and calculated their preferred angle of polarization (AoP) (Fig. 8C). As expected, the PSI values and preferred AoPs showed a bilateral coupling, with the right half of the PB (1R to 8R) resembling the left half (8L to 1L) (Fig. 8B,C). In different animals, the preferred AoP varied in glomeruli at corresponding positions in the PB (Fig. 8C). We also observed that the distribution of PSI values was not homogenous across the PB, and high values typically clustered across a contiguous subset of 2–4 glomeruli, while low PSI values occurred throughout the remaining glomeruli (Fig. 8B). Across the glomeruli in each cluster, the preferred AoP was similar in a given animal (Fig. 8C). It should be noted that these clusters of high PSI values correspond to the regions of highest modulation over a period of minutes, not an instantaneous locus of intensity which moved across the PB (activity bump) (Giraldo et al., 2018; Green et al., 2017). Indeed, glomeruli with high average intensities often exhibited low PSI values (arrowhead, Fig. 8B,C).

**Figure 8: E-PG neurons respond to polarized light with flexible tuning and no fixed polarotopic map**

**A:** Schematic of E-PG columnar neuron projections and connectivity with tangential ring neurons in the ellipsoid body (EB). See also Fig. S6.

**B:** Example spatial maps of polarization-selectivity index (PSI) in E-PG synapses recorded in the protocerebral bridge (PB) (SS00096-Gal4>sytGCaMP6s). Data shown are from maximum-selectivity projections through the PB. ROIs (gray) demarcate glomeruli.

**C:** Example polarization tuning maps corresponding to recordings in **A**. Pixels with a below-threshold PSI value, or falling outside an ROI drawn around the PB, show average intensity in grayscale. Scale bar denotes 25  $\mu$ m.

**D:** Probability distributions of PSI values in E-PG neurons recorded in the PB and R4m neurons recorded in the EB (average PSI E-PG neurons: 0.14, CI 0.05, background: 0.19, CI 0.01, N = 22 animals,  $p = 0.0001$  t-test; R4m neurons: 0.34, CI 0.11, background: 0.21, CI 0.03, N = 7 animals,  $p = 0.02$  t-test). Mean  $\pm$  CI.

**E:** Effect of polarizer on median PSI values versus controls with polarizer removed, within E-PG and R4m neurons (light dots) and background regions (dark dots) in individual animals (mean  $\Delta$ PSI E-PG neurons: 0.06, CI 0.05, N = 22,  $p < 10^{-4}$  t-test, background: 0.01, CI 0.01, N = 22,  $p = 0.0007$ , t-test; R4m neurons: 0.21, CI 0.11, N = 7,  $p = 0.002$  t-test, background: 0.03, CI 0.03, N = 7,  $p = 0.04$ , t-test).

**F:** Activity in two pairs of L/R ROIs in **C** (fly 3) in response to different angles of polarization. Arrowhead indicates position of expected peak.

**G:** Cycle-by-cycle characterization of E-PG responses across the PB in a single recording (fly 3, **C**). Vector orientation represents preferred AoP, length represents PSI (grid spacing equal to 1). Highlighted boxes indicate extended data for pairs shown in **F**. Arrowhead indicates the same cycle as the arrowhead in **F**.

**H:** Scatter plot showing position of paired E-PG glomeruli in the PB and preferred angle of polarization (AoP) (pooled data  $p = 0.23$ , N = 19 animals,  $p = 0.006$  permutation test, 152 ROIs, mean ROI PSI  $0.34 \pm 0.06$ ; 5 significant individual circular-circular correlations, mean  $\rho = 0.46$ , SEM 0.45).

**I:** Normalized probability of tuning shift magnitude with distance from the glomerulus with the highest PSI value (mean shift between positions 2 to 3,  $p = 0.21$ ; 3 to 4,  $p = 0.65$ ; 2 to 4,  $p = 0.08$ ; all other pairs  $p < 10^{-3}$ , N = 19 animals, 152 ROIs). See also Fig. S6.

Overall, we found substantially lower PSI values in E-PG neurons than in R4m neurons (Fig. 8D). We found a statistically significant effect of the polarizer on PSI values versus controls in both populations (Fig. 8E), yet in E-PG neurons the effect size was small and the average PSI value was generally lower than in background regions of recordings (Fig. S6C). To explore this

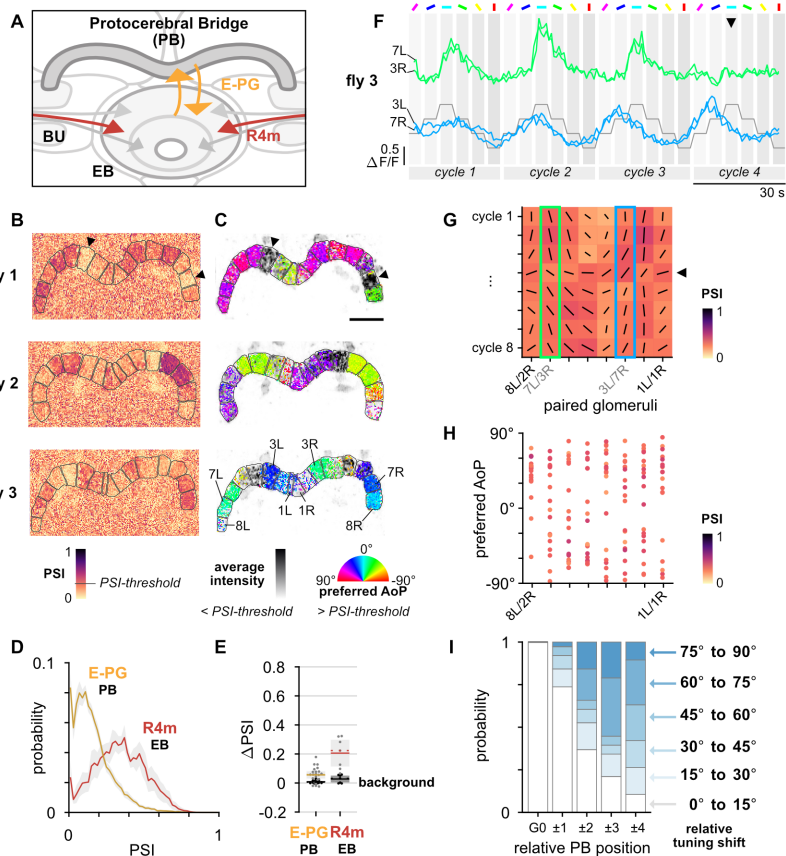

discrepancy, we examined the responses of individual glomeruli in the PB in response to cycles of the polarizer (Fig. 8F). Here, in the PB, we observed characteristics which distinguished the responses from those of all other polarization-sensitive elements that we recorded in the upstream pathway. First, the amplitude of responses was often found to be inconsistent over multiple rotation

980 cycles of the polarizer (Fig. 8F, top). Second, the peak response  
981 was often found to occur at different positions of the polarizer over  
982 multiple cycles (Fig. 8F, bottom). For both of these response  
983 characteristics, variations were synchronized across the left and  
984 right PB glomerulus pair (Fig. 8F). When we analyzed responses  
985 to individual cycles of the polarizer separately, these  
986 characteristics manifested as PSI values and preferred AoPs  
987 which varied over time (Fig. 8G). To obtain a measure of  
988 synchronicity between E-PG modulation and the polarizer  
989 stimulus, we examined the auto-correlation function of all individual  
990 glomerular responses, and compared them with those of R4m and  
991 TuBu<sub>a</sub> neurons recorded in the anterior bulb (BUa). For E-PG  
992 neurons, we found that less than half of all glomeruli recorded  
993 exhibited a periodicity which matched the stimulus, while almost all  
994 R4m and TuBu<sub>a</sub> neurons matched the stimulus (E-PG: 43.3%,  
995 R4m: 98.4%, TuBu<sub>a</sub>: 100%) (Fig. S6D). Therefore, although  
996 periodic, when observed over multiple cycles the majority of E-PG  
997 responses were found to be no more synchronized with the  
998 rotation of the stimulus than the fluctuations in their activity  
999 recorded with the polarizer removed (Fig. S6D). This finding is  
1000 reminiscent of the observation of 'conditional'  
1001 polarization-sensitivity in some columnar neuron types in the locust  
1002 central complex (Heinze and Homberg, 2009). While we did not  
1003 specifically test the stability of R4m responses recorded in the EB  
1004 as we could not distinguish individual neurons, it should also be  
1005 noted that the E-PG activity analyzed also potentially represents  
1006 multiple neurons per glomerulus which could have been  
1007 differentially active. Nevertheless, their activity profiles (Fig. 7D,  
1008 Fig. 8F) and the difference in their average PSI values (Fig. 8D,E)  
1009 indicate that, if E-PG polarization-sensitivity does indeed result  
1010 from R4m input, an additional transformation of signals occurs  
1011 between these neurons.

1012 We next sought to address the organization of preferential  
1013 responses to polarized light in the PB, acknowledging that neither  
1014 the preferred angles of polarization nor the PSI values calculated  
1015 for E-PG neurons were necessarily stable over time (Fig. 8G). We  
1016 therefore limited our analysis to individual cycles of the stimulus,  
1017 and we pooled the coordinated responses of glomeruli from the left  
1018 and right sides of the PB. To evaluate the most appropriate  
1019 pooling, we cross-correlated the activity recorded from pairs of left  
1020 and right glomeruli under different pairing schemes and found the  
1021 normalized coefficient as an indication of their similarity (Fig. S6E).  
1022 The pairing scheme following the logic 1L/1R, 8L/2R, 7L/3R, etc.  
1023 (Fig. S6E) yielded the highest mean similarity across all glomeruli,  
1024 which decreased with a sinusoidal profile as the distance between  
1025 pairs increased (Fig. S6F). This pairing confirms a scheme  
1026 proposed based on anatomical connectivity (Wolff et al., 2015), but  
1027 differs by one position from the proposed connectivity in the locust,  
1028 where a pairing scheme corresponding to 1L/8R, 8L/1R, 7L/2R,  
1029 etc. (Fig. S6E) has previously been used to pool data (Heinze and  
1030 Homberg, 2009).

1031 Across animals, we found no common relationship between  
1032 glomerulus position in the PB and the preferred angle of  
1033 polarization (AoP) of E-PG neurons (Fig. 8H), matching the  
1034 findings for the homologous CL1a neurons in locusts (Heinze and  
1035 Homberg, 2009; Pegel et al., 2019). We then asked whether, on  
1036 the timescale of a single stimulus cycle (30 s), there was any  
1037 relationship between PB position and preferred AoP in an  
1038 individual animal. In each recording, we picked at random a single  
1039 response cycle in which the average PSI value across all  
1040 glomerulus pairs exceeded a threshold (mean + 1 SD of PSI  
1041 values in background regions of all E-PG recordings). We then

1042 identified the glomerulus pair with the maximum average PSI  
1043 value, which we refer to as G0, and expressed all preferred AoPs,  
1044 PSI values and positions in the PB relative to G0 (Fig. S6G).  
1045 Smooth transitions in preferred AoP across glomeruli were  
1046 observed infrequently, and in 6 out of 19 animals this resulted in a  
1047 weak relationship between PB position and preferred angle of  
1048 polarization (asterisks, Fig. S6G).

1049 More generally, we found that glomeruli neighboring G0, at  $\pm 1$   
1050 PB position, were likely to exhibit a similar preferred AoP to G0, to  
1051 within  $15^\circ$  (Fig. 8I, Fig. S6G). At  $\pm 2-4$  PB positions from G0, we  
1052 found preferred AoPs generally shifted towards orthogonal angles  
1053 (Fig. 8I, Fig. S6G) and among these positions there was again a  
1054 similarity between neighboring glomeruli (Fig. S6H). These data  
1055 support our initial observation of clusters of glomeruli with similar  
1056 tunings and PSI values (Fig. 8B,C), contrasting with the  
1057 polarotopic organization of tunings across the PB found for CPU1  
1058 neurons in locusts (likely homologous to P-F-R neurons in flies)  
1059 (Heinze and Homberg, 2007; Honkanen et al., 2019; Pegel et al.,  
1060 2019). A limited representation of two orthogonal angles of  
1061 polarization in columnar neurons would also be congruent with a  
1062 single predominant tuning being conveyed by the R4m population  
1063 (Fig. 7D), since rectification of a sinusoidal tuning function would  
1064 directly lead to two signals with peak responses at orthogonal  
1065 angles.

## 1066 DISCUSSION

1067 In this study we have demonstrated that each section of the  
1068 *Drosophila* anterior visual pathway (AVP) contains  
1069 polarization-tuned neurons. Together, they provide a circuit to  
1070 convey polarized light signals from the specialized dorsal rim area  
1071 of the eye to the compass neurons of the central complex, via the  
1072 anterior optic tubercle and bulb. This pathway also conveys  
1073 information about unpolarized visual features, as shown here and  
1074 in previous studies. The encoding of multiple visual modalities, the  
1075 similarities in the constituent neurons, and the organization of the  
1076 neuropils which accommodate them (Omoto et al., 2017), support  
1077 the view that the AVP in *Drosophila* is homologous to the sky  
1078 compass pathway described in locusts, bees, butterflies, and  
1079 beetles, among other insects (Honkanen et al., 2019; Warren et  
1080 al., 2019).

1081 Our approach to investigating the neural processing of  
1082 polarization vision offered a number of advantages over traditional  
1083 intracellular electrophysiology. Firstly, it allowed us to  
1084 simultaneously record from whole populations of neurons, which  
1085 would otherwise be technically challenging. Here, we exploited this  
1086 to investigate the spatial organization of polarization responses in  
1087 an individual animal. This may be key in understanding the central  
1088 complex, where dynamic responses reflect circuit plasticity and  
1089 depend on numerous factors, such as proprioceptive inputs,  
1090 internal states and goal-direction. Next, targeted expression of  
1091 calcium indicators allowed us to isolate specific anatomical groups  
1092 of neurons, such as specific TuBu or ring neuron populations,  
1093 greatly increasing the repeatability of functional characterizations.  
1094 Crucially, the identification of corresponding genetic drivers will  
1095 enable silencing experiments, optogenetic stimulation and  
1096 multi-population recordings to probe circuit function in the future.  
1097 Imaging of calcium indicators also facilitated the characterization of  
1098 neurons whose axons are prohibitively thin for recording  
1099 intracellularly. MeTu-like neurons, for example, have long been  
1100 assumed to deliver polarization signals from the medulla to the

1101 anterior optic tubercle, and here we were able to confirm this by  
1102 direct observation for the first time.

### 1103 **Skylight polarization features extracted by the MEDRA**

1104 Since each detector for polarized light in the DRA essentially has a  
1105 different field of view, the success of this approach depended on  
1106 the ability to stimulate a sizable number of DRA ommatidia.  
1107 Surprisingly, almost the full extent of the DRA was stimulated by  
1108 polarized light originating from a single point in the visual field with  
1109 a common angle of polarization. A wide range of polarization  
1110 tunings was subsequently revealed in downstream neurons,  
1111 supporting the idea that the *Drosophila* medulla dorsal rim area  
1112 (MEDRA) analyzes the overall pattern of polarized light in the sky  
1113 and extracts a predominant angle of polarization (AoP) (Labhart,  
1114 2016; Rossel and Wehner, 1986), rather than performing many  
1115 local AoP estimates. During the morning and evening when  
1116 *D. melanogaster* are most active, the pattern of polarization in the  
1117 sky can be well approximated by a single, predominant AoP.  
1118 DmDRA1 neurons appear to spatially integrate polarization signals  
1119 from multiple columns of the MEDRA (Fig. 1), and individual  
1120 neurons heavily overlap each other (Sancer et al., 2019). This  
1121 could provide an additional robustness to occlusions of the sky or  
1122 of the DRA itself and average out inconsistencies in the available  
1123 light (Labhart et al., 2001; Rossel and Wehner, 1986).

1124 The parallel circuitry between DRA R7, DmDRA1 and MeTu  
1125 neurons in MEDRA columns (Fig. 2D), resembles the  
1126 color-processing pathway found in non-DRA columns involving R7,  
1127 Dm8 and Tm5c (Gao et al., 2008; Karuppudurai et al., 2014).  
1128 MeTu neurons in the MEDRA may also integrate color signals, as  
1129 their dendritic fields extend into the non-DRA medulla, indicating  
1130 that color and polarization processing are compatible (Fig. S3). We  
1131 have not functionally described the responses of DmDRA2 cells  
1132 that contact R8 cells in this study (Sancer et al., 2019), and these  
1133 cells may be differently integrated with color processing. Both  
1134 parallel functions will likely need to be incorporated to build a  
1135 complete conceptual model of skylight polarization processing in  
1136 the medulla.

### 1137 **Sensory transformations through the AVP**

1138 In the anterior optic tubercle (AOTU), we found  
1139 polarization-sensitive neuron populations entering and leaving the  
1140 tubercle via the intermediate-lateral domain (Fig. 2–4). We also  
1141 observed polarization responses in the lateral domain, although it  
1142 is unclear whether this is a result of separate polarization-sensitive  
1143 MeTu types projecting from the MEDRA to different AOTU  
1144 domains. Alternatively, since MeTu neurons are also postsynaptic  
1145 in the AOTU (Omoto et al., 2017), signals from a single  
1146 polarization input channel could be redistributed to different  
1147 regions of the AOTU for integration with other visual modalities or  
1148 bilateral interactions (Fig. 3). The AOTU in *Drosophila* is also likely  
1149 to be a site for modulation of signals depending on time or internal  
1150 states (Guo et al., 2018; el Jundi et al., 2014; Lamaze et al., 2018),  
1151 and a capacity to modify responses may explain why we observed  
1152 multiple polarotopic organizations in a MeTu neuron population in  
1153 the AOTU (Fig. S3). However, there may also be multiple  
1154 functional subtypes within the population that more tailored  
1155 experiments may be able to distinguish.

1156 Intriguingly, none of the polarotopies found in presynaptic  
1157 MeTu neurons (Fig. 2L,M) matched the polarotopy of postsynaptic  
1158 TuBu dendrites in the AOTU (Fig. 4G,I), which was extremely  
1159 consistent across animals. Our findings suggest that TuBu  
1160 neurons extract a processed form of the signals in the AOTU,  
1161 encoding visual features within fewer neurons than the MeTu

1162 populations. TuBu neurons appear to divide signals into functional  
1163 groups, and the anterior bulb-projecting TuBu<sub>s</sub> group in every fly  
1164 contained a set of around six tunings covering -90° to +90° of  
1165 polarization space in approximately 30° steps, tightly-packed in a  
1166 micro-glomerular structure with no apparent polarotopy (Fig. 5, Fig.  
1167 6). The question remains open as to whether a sun position  
1168 system and skylight polarization system are independent in the  
1169 bulb. Unlike the TuLAL neurons in locusts (homologous to TuBu),  
1170 where there is convergence on the dendrites of postsynaptic  
1171 neurons (Hadeln et al., 2020; Pegel et al., 2018; Pfeiffer et al.,  
1172 2005), TuBu neurons appear to form one-to-one contact with  
1173 individual ring neurons (Omoto et al., 2017). Hence, we posit that  
1174 the site of integration of celestial cues is not at the synapse  
1175 between TuBu and ring neurons. Although we found evidence that  
1176 angles of polarization are represented in the superior bulb (Fig. 5,  
1177 Fig. 6), where unpolarized cues are also known to be represented,  
1178 the populations we recorded contained a limited range of tunings  
1179 and resembled a system for detecting visual features with a  
1180 particular polarization signature (Labhart, 2016), such as  
1181 horizontally polarized light reflected from surfaces like water, rather  
1182 than a system for accurate estimation of orientation. Such  
1183 responses would likely be mediated by more ventral regions of the  
1184 eye than the DRA (Velez et al., 2014; Wernet et al., 2012). It  
1185 should be noted that our polarized light stimulus broadly  
1186 illuminated the eye from a dorsal position and, although we  
1187 attempted to minimize reflections, we did not measure whether  
1188 reflected polarized light fell on the ventral eye during our  
1189 experiments.

### 1190 **Stereotypic polarotopy in the periphery gives way to 1191 idiosyncratic plasticity in the CX**

1192 By recording the ensemble response of a population of R4m ring  
1193 neurons, both in the anterior bulb and ellipsoid body (EB), we  
1194 determined that they do not simply relay the responses of  
1195 presynaptic TuBu<sub>s</sub> neurons to the EB. Instead, they appear to  
1196 deliver a subset of signals more prominently than others,  
1197 bestowing the population with an ensemble response tuned to a  
1198 specific angle of polarization (Fig. 7). Furthermore, we found that  
1199 this population tuning conveys a different angle of polarization in  
1200 individual animals, and one exciting possibility is that this  
1201 represents a flexible heading signal relative to polarized light cues,  
1202 which could direct behavior (Warren et al., 2018). A question to  
1203 address in future work is whether the preferred angle of  
1204 polarization of an individual ring neuron is itself fixed, in which  
1205 case we may have observed the result of a winner-take-all  
1206 competition among the R4m population in the EB, or if the whole  
1207 population flexibly re-tunes to preferentially respond to a common  
1208 AoP. Recordings from individual neurons will be required to resolve  
1209 this.

1210 It is clear that among R4m and E-PG neurons, polarization  
1211 tunings are not represented with a retinotopic map in the EB or PB  
1212 which is common between individual animals (Fig. 7, Fig. 8). This  
1213 is in contrast with the consistent polarotopic organizations found  
1214 upstream in the MEDRA or AOTU (Fig. 1–4), but in agreement  
1215 with a previous study which showed that the azimuthal position of  
1216 unpolarized visual stimuli is also not represented retinotopically in  
1217 E-PG neurons (Fisher et al., 2019). The lack of organization in  
1218 E-PG responses also matches previous findings in the  
1219 corresponding CL1a neurons in locusts, but contrasts with the  
1220 polarotopic organization found in other columnar neurons in the  
1221 locust CX, such as CPU1, and the tangential TB1 neurons (Heinze  
1222 and Homberg, 2007, 2009; Pegel et al., 2019). A potential



1223 explanation for the lack of consistent polarotopy in CL1a, or indeed  
1224 E-PG neurons, was offered by Heinze and Homberg (2009): at  
1225 least two of each neuron type innervates an individual glomerulus  
1226 in the PB. Could each of these have differential responses to  
1227 polarized light to enable different configurations across the PB?  
1228 Intriguingly, the TB1-like  $\Delta 7$  neurons in the *Drosophila* PB appear  
1229 to synapse onto only a subset of the E-PG neurons in a single  
1230 glomerulus (Turner-Evans et al., 2020), perhaps indicating  
1231 independent functional groups. We may therefore yet find a  
1232 polarotopic organization of responses in the *Drosophila* CX.  
1233 Alternatively, such an organization may reflect a common,  
1234 genetically pre-programmed directional goal to facilitate migration,  
1235 which flies may lack (Honkanen et al., 2019), instead using  
1236 polarization cues to follow a fixed course and disperse along  
1237 idiosyncratic headings (Dickinson, 2014).

1238 Our data suggest that in a given fly, E-PG neurons may  
1239 respond to one of two approximately orthogonal angles of  
1240 polarization, effectively dividing the population into two groups.  
1241 Interestingly, when data from locust CPU1 neurons (likely  
1242 homologues of P-F-R neurons in *Drosophila*) were pooled with  
1243 tunings obtained from a number of other polarization-sensitive  
1244 columnar CX neuron types, including CL1b (P-EG), CL2 (P-EN),  
1245 CPU2, and CPU4 (P-FN), the organization of tunings in the locust  
1246 PB could be interpreted as clustering around two orthogonal  
1247 preferred angles (Heinze and Homberg, 2009). A binary system  
1248 such as this would be well suited to influence downstream  
1249 processes in a motor-centered coordinate frame (Rayshubskiy et  
1250 al., 2020). For example, the eventual output of the compass  
1251 network may be a command signal to activate one descending  
1252 neuron of a bilateral pair to initiate a turn to either the left or right,  
1253 and thus maintain a heading specified by polarization patterns in  
1254 the sky.

1255 An important next step will be to understand how polarized  
1256 light influences the activity bump in columnar neurons and whether  
1257 the activity of columnar neurons reciprocally influences the tunings  
1258 of R4m neurons. We did not observe an activity bump in E-PG  
1259 neurons in the PB, likely due to the open-loop stimulus  
1260 presentation and recordings performed in immobilized animals,  
1261 although we could see evidence of flexible encoding of polarization  
1262 information (Fig. 8). According to our mappings of E-PG responses  
1263 in the PB, the influence of a rotating polarized light stimulus might  
1264 be to move the activity bump discontinuously between two  
1265 positions, not dissimilar to observations in a recent investigation of  
1266 the influence of airflow on the bump in E-PG neurons (Okubo et  
1267 al., 2020). However, a limitation of the polarization stimulus used  
1268 here is that the intensity gradient and position of the light source  
1269 did not change as the angle of polarization rotated, as it would be  
1270 seen to by an animal turning under a natural sky. If the ambiguity  
1271 between 0/180° polarization cues is resolved by integrating light  
1272 intensity information, then the stimulus we used here presented  
1273 contradictory, unnatural changes. Behavioral studies in ants  
1274 (Wehner and Müller, 2006) and dung beetles (el Jundi et al., 2015)  
1275 have demonstrated that skylight polarization cues can have a  
1276 greater influence than other visual features in guidance and  
1277 navigation behaviors, while in *Drosophila* intensity gradients  
1278 appear to have a greater behavioral significance (Warren et al.,  
1279 2018). A key challenge for future studies will be to uncover the  
1280 mechanisms for integrating and selecting from the multiple sensory  
1281 modalities and visual qualities represented in the central complex  
1282 in order to navigate complex environments.

## 1283 References

- 1284 Batschelet, E. (1965). Statistical methods for the analysis of problems in animal  
1285 orientation and certain biological rhythms (Washington, D.C.: American Institute of  
1286 Biological Sciences).
- 1287 Berens, P. (2009). CircStat: A MATLAB toolbox for circular statistics. *J. Stat. Softw.* 31,  
1288 1–21.
- 1289 Braitenberg, V. (1986). *Vehicles: Experiments in Synthetic Psychology* (Cambridge: MIT  
1290 Press).
- 1291 Chen, T.-W., Wardill, T.J., Sun, Y., Pulver, S.R., Renninger, S.L., Baohan, A., Schreiter,  
1292 E.R., Kerr, R.A., Orger, M.B., Jayaraman, V., et al. (2013). Ultrasensitive fluorescent  
1293 proteins for imaging neuronal activity. *Nature* 499, 295–300.
- 1294 Cohn, R., Morante, I., and Ruta, V. (2015). Coordinated and compartmentalized  
1295 neuromodulation shapes sensory processing in *Drosophila*. *Cell* 163, 1742–1755.
- 1296 Collett, T.S., and Collett, M. (2002). Memory use in insect visual navigation. *Nat. Rev.*  
1297 *Neurosci.* 3, 542–552.
- 1298 Courgeon, M., and Desplan, C. (2019). Coordination between stochastic and  
1299 deterministic specification in the *Drosophila* visual system. *Science* 366.
- 1300 Cronin, T.W., and Marshall, J. (2011). Patterns and properties of polarized light in air and  
1301 water. *Phil. Trans. R. Soc. B* 366, 619–626.
- 1302 Dacke, M., Nilsson, D.-E., Scholtz, C.H., Byrne, M., and Warrant, E.J. (2003). Animal  
1303 behaviour: insect orientation to polarized moonlight. *Nature* 424, 33.
- 1304 Davis, F.P., Nern, A., Picard, S., Reiser, M.B., Rubin, G.M., Eddy, S.R., and Henry, G.L.  
1305 (2020). A genetic, genomic, and computational resource for exploring neural circuit  
1306 function. *eLife* 9.
- 1307 Demerec, M. (1950). *Biology of Drosophila* (New York: Wiley).
- 1308 Dickinson, M.H. (2014). Death Valley, *Drosophila*, and the Devonian toolkit. *Annu. Rev.*  
1309 *Entomol.* 59, 51–72.
- 1310 Donlea, J.M., Pimentel, D., and Miesenböck, G. (2014). Neuronal machinery of sleep  
1311 homeostasis in *Drosophila*. *Neuron* 81, 860–872.
- 1312 Dus, M., Ai, M., and Suh, G.S.B. (2013). Taste-independent nutrient selection is  
1313 mediated by a brain-specific Na<sup>+</sup>/solute co-transporter in *Drosophila*. *Nat. Neurosci.* 16,  
1314 526–528.
- 1315 Efron, B. (1987). Better bootstrap confidence intervals. *J. Am. Stat. Assoc.* 82, 171–185.
- 1316 Feiler, R., Bjornson, R., Kirschfeld, K., Mismar, D., Rubin, G.M., Smith, D.P., Socolich,  
1317 M., and Zuker, C.S. (1992). Ectopic expression of ultraviolet-rhodopsins in the blue  
1318 photoreceptor cells of *Drosophila*: Visual physiology and photochemistry of transgenic  
1319 animals. *J. Neurosci.* 12, 3862–3868.
- 1320 Fisher, Y.E., Lu, J., D’Alessandro, I., and Wilson, R.I. (2019). Sensorimotor experience  
1321 remaps visual input to a heading-direction network. *Nature* 576, 121–125.
- 1322 Fortini, M.E., and Rubin, G.M. (1991). The optic lobe projection pattern of  
1323 polarization-sensitive photoreceptor cells in *Drosophila melanogaster*. *Cell Tissue Res.*  
1324 265, 185–191.
- 1325 Foster, J.J., Temple, S.E., How, M.J., Daly, I.M., Sharkey, C.R., Wilby, D., and Roberts,  
1326 N.W. (2018). Polarisation vision: overcoming challenges of working with a property of  
1327 light we barely see. *Sci. Nat.* 105, 27.
- 1328 Franconville, R., Beron, C., and Jayaraman, V. (2018). Building a functional connectome  
1329 of the *Drosophila* central complex. *eLife* 7.
- 1330 v. Frisch, K. (1949). Die Polarisation des Himmelslichtes als orientierender Faktor bei  
1331 den Tänzern der Bienen. *Experientia* 5, 142–148.
- 1332 Fujita, S.C., Zipursky, S.L., Benzer, S., Ferrús, A., and Shotwell, S.L. (1982). Monoclonal  
1333 antibodies against the *Drosophila* nervous system. *Proc. Natl. Acad. Sci. USA* 79,  
1334 7929–7933.
- 1335 Gao, S., Takemura, S.-Y., Ting, C.-Y., Huang, S., Lu, Z., Luan, H., Rister, J., Thum, A.S.,  
1336 Yang, M., Hong, S.-T., et al. (2008). The neural substrate of spectral preference in  
1337 *Drosophila*. *Neuron* 60, 328–342.
- 1338 Giraldo, Y.M., Leitch, K.J., Ros, I.G., Warren, T.L., Weir, P.T., and Dickinson, M.H. (2018).  
1339 Sun navigation requires compass neurons in *Drosophila*. *Curr. Biol.* 28, 2845–2852.e4.
- 1340 Gomez-Marín, A., Duistermars, B.J., Frye, M.A., and Louis, M. (2010). Mechanisms of  
1341 odor-tracking: multiple sensors for enhanced perception and behavior. *Front. Cell.*  
1342 *Neurosci.* 4, 6.
- 1343 Green, J., Adachi, A., Shah, K.K., Hirokawa, J.D., Magani, P.S., and Maimon, G. (2017).  
1344 A neural circuit architecture for angular integration in *Drosophila*. *Nature* 546, 101–106.
- 1345 Guizar-Sicairos, M., Thurman, S.T., and Fienu, J.R. (2008). Efficient subpixel image  
1346 registration algorithms. *Opt. Lett.* 33, 156–158.
- 1347 Guo, F., Holla, M., Diaz, M.M., and Rosbash, M. (2018). A circadian output circuit  
1348 controls sleep-wake arousal in *Drosophila*. *Neuron* 100, 624–635.e4.
- 1349 Hadelin, J., Hensgen, R., Bockhorst, T., Rosner, R., Heidasch, R., Pegel, U., Pérez, M.Q.,  
1350 and Homberg, U. (2020). Neuroarchitecture of the central complex of the desert locust:  
1351 tangential neurons. *J. Comp. Neurol.* 528, 906–934.
- 1352 Hanesch, U., Fischbach, K.-F., and Heisenberg, M. (1989). Neuronal architecture of the  
1353 central complex in *Drosophila melanogaster*. *Cell Tissue Res.* 257, 343–366.
- 1354 Hardie, R.C. (1984). Properties of photoreceptors R7 and R8 in dorsal marginal  
1355 ommatidia in the compound eyes of *Musca* and *Calliphora*. *J. Comp. Physiol. A* 154,  
1356 157–165.
- 1357 Heinze, S. (2013). Polarization vision. In *Encyclopedia of Computational Neuroscience*,  
1358 D. Jaeger, and R. Jung, eds. (New York: Springer), pp. 1–30.
- 1359 Heinze, S. (2014). Polarized-light processing in insect brains: recent insights from the  
1360 desert locust, the monarch butterfly, the cricket, and the fruit fly. In *Polarized Light and*  
1361 *Polarization Vision in Animal Sciences*, G. Horváth, ed. (Berlin: Springer), pp. 61–111.

- 1362 Heinze, S., and Homberg, U. (2007). Maplike representation of celestial *E*-vector  
1363 orientations in the brain of an insect. *Science* 315, 995–997.
- 1364 Heinze, S., and Homberg, U. (2009). Linking the input to the output: new sets of neurons  
1365 complement the polarization vision network in the locust central complex. *J. Neurosci.*  
1366 29, 4911–4921.
- 1367 Heinze, S., and Reppert, S.M. (2011). Sun compass integration of skylight cues in  
1368 migratory monarch butterflies. *Neuron* 69, 345–358.
- 1369 Heinze, S., Florman, J., Asokaraj, S., el Jundi, B., and Reppert, S.M. (2013). Anatomical  
1370 basis of sun compass navigation II: the neuronal composition of the central complex of  
1371 the monarch butterfly. *J. Comp. Neurol.* 521, 267–298.
- 1372 Homberg, U., Hofer, S., Pfeiffer, K., and Gebhardt, S. (2003). Organization and neural  
1373 connections of the anterior optic tubercle in the brain of the locust, *Schistocerca gregaria*.  
1374 *J. Comp. Neurol.* 462, 415–430.
- 1375 Homberg, U., Heinze, S., Pfeiffer, K., Kinoshita, M., and el Jundi, B. (2011). Central  
1376 neural coding of sky polarization in insects. *Phil. Trans. R. Soc. B* 366, 680–687.
- 1377 Honkanen, A., Adden, A., da Silva Freitas, J., and Heinze, S. (2019). The insect central  
1378 complex and the neural basis of navigational strategies. *J. Exp. Biol.* 222, jeb188854.
- 1379 Horváth, G., and Varjú, D. (2004). Polarized Light in Animal Vision: Polarization Patterns  
1380 in Nature (Berlin: Springer).
- 1381 Immonen, E.-V., Dacke, M., Heinze, S., and el Jundi, B. (2017). Anatomical organization  
1382 of the brain of a diurnal and a nocturnal dung beetle. *J. Comp. Neurol.* 525, 1879–1908.
- 1383 Jenett, A., Rubin, G.M., Ngo, T.-T.B., Shepherd, D., Murphy, C., Dionne, H., Pfeiffer, B.D.,  
1384 Cavallaro, A., Hall, D., Jeter, J., et al. (2012). A GAL4-driver line resource for *Drosophila*  
1385 neurobiology. *Cell Rep.* 2, 991–1001.
- 1386 el Jundi, B., Pfeiffer, K., and Homberg, U. (2011). A distinct layer of the medulla  
1387 integrates sky compass signals in the brain of an insect. *PLoS One* 6, e27855.
- 1388 el Jundi, B., Pfeiffer, K., Heinze, S., and Homberg, U. (2014). Integration of polarization  
1389 and chromatic cues in the insect sky compass. *J. Comp. Physiol. A Neuroethol. Sens.*  
1390 *Neural Behav. Physiol.* 200, 575–589.
- 1391 el Jundi, B., Warrant, E.J., Byrne, M.J., Khaldy, L., Baird, E., Smolka, J., and Dacke, M.  
1392 (2015). Neural coding underlying the cue preference for celestial orientation. *Proc. Natl.*  
1393 *Acad. Sci. USA* 112, 11395–11400.
- 1394 Karupppudurai, T., Lin, T.-Y., Ting, C.-Y., Pursley, R., Melnattur, K.V., Diao, F., White, B.H.,  
1395 Macpherson, L.J., Gallio, M., Pohida, T., et al. (2014). A hard-wired glutamatergic circuit  
1396 pools and relays UV signals to mediate spectral preference in *Drosophila*. *Neuron* 81,  
1397 603–615.
- 1398 Kempter, R., Leibold, C., Buzsáki, G., Diba, K., and Schmidt, R. (2012). Quantifying  
1399 circular-linear associations: hippocampal phase precession. *J. Neurosci. Methods* 207,  
1400 113–124.
- 1401 Kim, S.S., Rouault, H., Druckmann, S., and Jayaraman, V. (2017). Ring attractor  
1402 dynamics in the *Drosophila* central brain. *Science* 356, 849–853.
- 1403 Kim, S.S., Hermundstad, A.M., Romani, S., Abbott, L.F., and Jayaraman, V. (2019).  
1404 Generation of stable heading representations in diverse visual scenes. *Nature* 576,  
1405 126–131.
- 1406 Labhart, T. (2016). Can invertebrates see the e-vector of polarization as a separate  
1407 modality of light? *J. Exp. Biol.* 219, 3844–3856.
- 1408 Labhart, T., Petzold, J., and Helbling, H. (2001). Spatial integration in  
1409 polarization-sensitive interneurons of crickets: a survey of evidence, mechanisms and  
1410 benefits. *J. Exp. Biol.* 204, 2423–2430.
- 1411 Lamaze, A., Krättschmer, P., Chen, K.-F., Lowe, S., and Jepson, J.E.C. (2018). A  
1412 wake-promoting circadian output circuit in *Drosophila*. *Curr. Biol.* 28, 3098–3105.e3.
- 1413 Liu, S., Liu, Q., Tabuchi, M., and Wu, M.N. (2016). Sleep drive is encoded by neural  
1414 plastic changes in a dedicated circuit. *Cell* 165, 1347–1360.
- 1415 Macpherson, L.J., Zaharieva, E.E., Kearney, P.J., Alpert, M.H., Lin, T.-Y., Turan, Z., Lee,  
1416 C.-H., and Gallio, M. (2015). Dynamic labelling of neural connections in multiple colours  
1417 by trans-synaptic fluorescence complementation. *Nat. Commun.* 6, 10024.
- 1418 Mappes, M., and Homberg, U. (2004). Behavioral analysis of polarization vision in  
1419 tethered flying locusts. *J. Comp. Physiol. A Neuroethol. Sens. Neural Behav. Physiol.*  
1420 190, 61–68.
- 1421 Mathejczyk, T.F., and Wernet, M.F. (2019). Heading choices of flying *Drosophila* under  
1422 changing angles of polarized light. *Sci. Rep.* 9, 16773.
- 1423 Nern, A., Pfeiffer, B.D., and Rubin, G.M. (2015). Optimized tools for multicolor stochastic  
1424 labeling reveal diverse stereotyped cell arrangements in the fly visual system. *Proc. Natl.*  
1425 *Acad. Sci. USA* 112, E2967–E2976.
- 1426 Neuser, K., Triphan, T., Mronz, M., Poeck, B., and Strauss, R. (2008). Analysis of a  
1427 spatial orientation memory in *Drosophila*. *Nature* 453, 1244–1247.
- 1428 Ofstad, T.A., Zuker, C.S., and Reiser, M.B. (2011). Visual place learning in *Drosophila*  
1429 *melanogaster*. *Nature* 474, 204–207.
- 1430 Okubo, T.S., Patella, P., D'Alessandro, I., and Wilson, R.I. (2020). A neural network for  
1431 wind-guided compass navigation. *Neuron* 107, 1–17.
- 1432 Omoto, J.J., Keleş, M.F., Nguyen, B.-C.M., Bolanos, C., Lovick, J.K., Frye, M.A., and  
1433 Hartenstein, V. (2017). Visual input to the *Drosophila* central complex by developmentally  
1434 and functionally distinct neuronal populations. *Curr. Biol.* 27, 1098–1110.
- 1435 Omoto, J.J., Nguyen, B.-C.M., Kandimalla, P., Lovick, J.K., Donlea, J.M., and  
1436 Hartenstein, V. (2018). Neuronal constituents and putative interactions within the  
1437 *Drosophila* ellipsoid body neuropil. *Front. Neural Circuits* 12, 103.
- 1438 Otsuna, H., Shinomiya, K., and Ito, K. (2014). Parallel neural pathways in higher visual  
1439 centers of the *Drosophila* brain that mediate wavelength-specific behavior. *Front. Neural*  
1440 *Circuits* 8, 8.
- 1441 Pegel, U., Pfeiffer, K., and Homberg, U. (2018). Integration of celestial compass cues in  
1442 the central complex of the locust brain. *J. Exp. Biol.* 221, jeb171207.
- 1443 Pegel, U., Pfeiffer, K., Zittrell, F., Scholtyssek, C., and Homberg, U. (2019). Two  
1444 compasses in the central complex of the locust brain. *J. Neurosci.* 39, 3070–3080.
- 1445 Pfeiffer, K., and Homberg, U. (2007). Coding of azimuthal directions via  
1446 time-compensated combination of celestial compass cues. *Curr. Biol.* 17, 960–965.
- 1447 Pfeiffer, K., and Kinoshita, M. (2012). Segregation of visual inputs from different regions  
1448 of the compound eye in two parallel pathways through the anterior optic tubercle of the  
1449 bumblebee (*Bombus ignitus*). *J. Comp. Neurol.* 520, 212–229.
- 1450 Pfeiffer, K., Kinoshita, M., and Homberg, U. (2005). Polarization-sensitive and  
1451 light-sensitive neurons in two parallel pathways passing through the anterior optic  
1452 tubercle in the locust brain. *J. Neurophysiol.* 94, 3903–3915.
- 1453 Phipson, B., and Smyth, G.K. (2010). Permutation *p*-values should never be zero:  
1454 calculating exact *p*-values when permutations are randomly drawn. *Stat. Appl. Genet.*  
1455 *Mol. Biol.* 9.
- 1456 Rayshubskiy, A., Holtz, S.L., D'Alessandro, I., Li, A.A., Vanderbeck, Q.X., Haber, I.S.,  
1457 Gibb, P.W., and Wilson, R.I. (2020). Neural circuit mechanisms for steering control in  
1458 walking *Drosophila*. *bioRxiv*, 10.1101/2020.04.04.024703.
- 1459 Reiser, M.B., and Dickinson, M.H. (2008). A modular display system for insect behavioral  
1460 neuroscience. *J. Neurosci. Methods* 167, 127–139.
- 1461 Rossel, S., and Wehner, R. (1986). Polarization vision in bees. *Nature* 323, 128–131.
- 1462 Salcedo, E., Huber, A., Henrich, S., Chadwell, L.V., Chou, W.H., Paulsen, R., and Britt,  
1463 S.G. (1999). Blue- and green-absorbing visual pigments of *Drosophila*: ectopic  
1464 expression and physiological characterization of the R8 photoreceptor cell-specific Rh5  
1465 and Rh6 rhodopsins. *J. Neurosci.* 19, 10716–10726.
- 1466 Sancer, G., Kind, E., Plazaola-Sasieta, H., Balke, J., Pham, T., Hasan, A., Münch, L.O.,  
1467 Courgeon, M., Mathejczyk, T.F., and Wernet, M.F. (2019). Modality-specific circuits for  
1468 skylight orientation in the fly visual system. *Curr. Biol.* 29, 2812–2825.e4.
- 1469 Saravanan, V., Berman, G.J., and Sober, S.J. Application of the hierarchical bootstrap to  
1470 multi-level data in neuroscience. *bioRxiv*, 10.1101/819334.
- 1471 Scheffer, L.K., Xu, C.S., Januszewski, M., Lu, Z., Takemura, S.-Y., Hayworth, K.J.,  
1472 Huang, G.B., Shinomiya, K., Maitlin-Shepard, J., Berg, S., et al. (2020). A connectome  
1473 and analysis of the adult *Drosophila* central brain. *eLife* 9, e57443.
- 1474 Schindelin, J., Arganda-Carreras, I., Frise, E., Kaynig, V., Longair, M., Pietzsch, T.,  
1475 Preibisch, S., Rueden, C., Saalfeld, S., Schmid, B., et al. (2012). Fiji: an open-source  
1476 platform for biological-image analysis. *Nat. Methods* 9, 676–682.
- 1477 Seelig, J.D., and Jayaraman, V. (2013). Feature detection and orientation tuning in the  
1478 *Drosophila* central complex. *Nature* 503, 262–266.
- 1479 Seelig, J.D., and Jayaraman, V. (2015). Neural dynamics for landmark orientation and  
1480 angular path integration. *Nature* 521, 186–191.
- 1481 Shaner, N.C., Campbell, R.E., Steinbach, P.A., Giepmans, B.N.G., Palmer, A.E., and  
1482 Tsien, R.Y. (2004). Improved monomeric red, orange and yellow fluorescent proteins  
1483 derived from *Discosoma* sp. red fluorescent protein. *Nat. Biotechnol.* 22, 1567–1572.
- 1484 Sharkey, C.R., Blanco, J., Leibowitz, M.M., Pinto-Benito, D., and Wardill, T.J. (2020). The  
1485 spectral sensitivity of *Drosophila* photoreceptors. *bioRxiv*, 10.1101/2020.04.03.024638.
- 1486 Shiozaki, H.M., and Kazama, H. (2017). Parallel encoding of recent visual experience  
1487 and self-motion during navigation in *Drosophila*. *Nat. Neurosci.* 20, 1395–1403.
- 1488 Shiozaki, H.M., Ohta, K., and Kazama, H. (2020). A multi-regional network encoding  
1489 heading and steering maneuvers in *Drosophila*. *Neuron* 106, 1–16.
- 1490 Stephens, G.C., Fingerman, M., and Brown, F.A. (1953). The Orientation of *Drosophila* to  
1491 Plane Polarized Light. *Ann. Entomol. Soc. Am.* 46, 75–83.
- 1492 Stone, T., Webb, B., Adden, A., Weddig, N.B., Honkanen, A., Templin, R., Wcislo, W.,  
1493 Scimeca, L., Warrant, E., and Heinze, S. (2017). An anatomically constrained model for  
1494 path integration in the bee brain. *Curr. Biol.* 27, 3069–3085.e11.
- 1495 Strausfeld, N.J. (1976). *Atlas of an Insect Brain* (Berlin: Springer).
- 1496 Strausfeld, N.J., and Hirth, F. (2013). Deep homology of arthropod central complex and  
1497 vertebrate basal ganglia. *Science* 340, 157–161.
- 1498 Sun, Y., Nern, A., Franconville, R., Dana, H., Schreiter, E.R., Looger, L.L., Svoboda, K.,  
1499 Kim, D.S., Hermundstad, A.M., and Jayaraman, V. (2017). Neural signatures of dynamic  
1500 stimulus selection in *Drosophila*. *Nat. Neurosci.* 20, 1104–1113.
- 1501 Talay, M., Richman, E.B., Snell, N.J., Hartmann, G.G., Fisher, J.D., Sorkaç, A., Santoyo,  
1502 J.F., Chou-Freed, C., Nair, N., Johnson, M., et al. (2017). Transsynaptic mapping of  
1503 second-order taste neurons in flies by *trans*-Tango. *Neuron* 96, 783–795.e4.
- 1504 Taube, J.S., Muller, R.U., and Ranck, J.B., Jr (1990). Head-direction cells recorded from  
1505 the postsubiculum in freely moving rats. I. Description and quantitative analysis. *J.*  
1506 *Neurosci.* 10, 420–435.
- 1507 Timaeus, L., Geid, L., and Hummel, T. (2017). A topographic visual pathway into the  
1508 central brain of *Drosophila*. *bioRxiv*, 10.1101/183707.
- 1509 Tirian, L., and Dickson, B.J. (2017). The VT GAL4, LexA, and split-GAL4 driver line  
1510 collections for targeted expression in the *Drosophila* nervous system. *bioRxiv*,  
1511 10.1101/198648.
- 1512 Turner-Evans, D.B., Jensen, K.T., Ali, S., Paterson, T., Sheridan, A., Ray, R.P., Wolff, T.,  
1513 Lauritzen, S., Rubin, G.M., Bock, D.D., et al. (2020). The neuroanatomical ultrastructure  
1514 and function of a biological ring attractor. *Neuron*, 10.1016/j.neuron.2020.08.006.
- 1515 Velez, M.M., Gohl, D., Clandinin, T.R., and Wernet, M.F. (2014). Differences in neural  
1516 circuitry guiding behavioral responses to polarized light presented to either the dorsal or  
1517 ventral retina in *Drosophila*. *J. Neurogenet.* 28, 348–360.
- 1518 Wada, S. (1974). Spezielle randzonale Ommatidien der Fliegen (Diptera: Brachycera):  
1519 Architektur und Verteilung in den Komplexaugen. *Z. Morph. Tiere* 77, 87–125.

1520 Warren, T.L., Weir, P.T., and Dickinson, M.H. (2018). Flying *Drosophila melanogaster*  
1521 maintain arbitrary but stable headings relative to the angle of polarized light. *J. Exp. Biol.*  
1522 *221*, jeb177550.

1523 Warren, T.L., Giraldo, Y.M., and Dickinson, M.H. (2019). Celestial navigation in  
1524 *Drosophila*. *J. Exp. Biol.* *222*, jeb186148.

1525 Wehner, R., and Müller, M. (2006). The significance of direct sunlight and polarized  
1526 skylight in the ant's celestial system of navigation. *Proc. Natl. Acad. Sci. USA* *103*,  
1527 12575–12579.

1528 Weir, P.T., and Dickinson, M.H. (2011). Flying *Drosophila* Orient to Sky Polarization. *Curr.*  
1529 *Biol.* *22*, 21–27.

1530 Weir, P.T., and Dickinson, M.H. (2015). Functional divisions for visual processing in the  
1531 central brain of flying *Drosophila*. *Proc. Natl. Acad. Sci. USA* *112*, E5523–E5532.

1532 Weir, P.T., Henze, M.J., Bleul, C., Baumann-Klausener, F., Labhart, T., and Dickinson,  
1533 M.H. (2016). Anatomical reconstruction and functional imaging reveal an ordered array of  
1534 skylight polarization detectors in *Drosophila*. *J. Neurosci.* *36*, 5397–5404.

1535 Wernet, M.F., Velez, M.M., Clark, D.A., Baumann-Klausener, F., Brown, J.R., Klovstad,  
1536 M., Labhart, T., and Clandinin, T.R. (2012). Genetic dissection reveals two separate  
1537 retinal substrates for polarization vision in *Drosophila*. *Curr. Biol.* *22*, 12–20.

1538 Wolf, R., Gebhardt, B., Gademann, R., and Heisenberg, M. (1980). Polarization  
1539 sensitivity of course control in *Drosophila melanogaster*. *J. Comp. Physiol.* *139*, 177–191.

1540 Wolff, T., Iyer, N.A., and Rubin, G.M. (2015). Neuroarchitecture and neuroanatomy of the  
1541 *Drosophila* central complex: A GAL4-based dissection of protocerebral bridge neurons  
1542 and circuits. *J. Comp. Neurol.* *523*, 997–1037.

1543 Yang, H.H., St-Pierre, F., Sun, X., Ding, X., Lin, M.Z., and Clandinin, T.R. (2016).  
1544 Subcellular imaging of voltage and calcium signals reveals neural processing in vivo. *Cell*  
1545 *166*, 245–257.

1546 Zar, J.H. (1999). *Biostatistical Analysis* (Harlow: Pearson).

1547 Zeller, M., Held, M., Bender, J., Berz, A., Heinloth, T., Hellfritz, T., and Pfeiffer, K. (2015).  
1548 Transmedulla neurons in the sky compass network of the honeybee (*Apis mellifera*) are a  
1549 possible site of circadian input. *PLoS One* *10*, e0143244.

## 1550 Acknowledgments

1551 We are grateful to Sam LoCascio for technical advice. Tanya Wolff  
1552 and Vivek Jayaraman kindly provided the split-Gal4 line SS00096.  
1553 We also thank Holger Krapp, Kit Longden, and members of the  
1554 Frye lab for their comments on the manuscript. Stocks obtained  
1555 from the Bloomington *Drosophila* Stock Center (NIH  
1556 P40OD018537) were used in this study. This work was supported  
1557 by grants from the NIH (R01-NS096290 to V.H. and  
1558 R01-EY026031 to M.A.F.).

## 1559 Author contributions

1560 Ordered according to main list of authors:

1561 **Conceptualization:** B.J.H., J.J.O., V.H., M.A.F.

1562 **Data curation:** B.J.H., P.K., B.-C.M.N.

1563 **Formal analysis:** B.J.H., J.J.O., P.K., B.-C.M.N.

1564 **Funding acquisition, resources, administration:** V.H., M.A.F.

1565 **Investigation:** B.J.H., J.J.O., P.K., B.-C.M.N., M.F.K., N.K.B.

1566 **Methodology:** B.J.H., J.J.O., M.F.K.

1567 **Software, validation:** B.J.H.

1568 **Supervision:** B.J.H., J.J.O., V.H., M.A.F.

1569 **Visualization:** B.J.H., J.J.O., P.K., V.H.

1570 **Writing – original draft:** B.J.H.

1571 **Writing – review & editing:** B.J.H., J.J.O., P.K., V.H., M.A.F.

## 1572 METHODS

### 1573 In vivo calcium imaging

#### 1574 Fly preparation

1575 Flies were raised at 25°C on a standard cornmeal/molasses diet in  
1576 40 ml vials, under a 12:12 hour dark:light cycle. Imaging  
1577 experiments were performed between ZT0–14, although time of  
1578 day was not a factor in our experimental design or analysis. We  
1579 imaged 1–7 day old female flies expressing either UAS-GCaMP6s  
1580 (Chen et al., 2013) for dendritic regions or UAS-sytGCaMP6s  
1581 (Cohn et al., 2015) for axon terminals, together with UAS-tdTomato  
1582 (Shaner et al., 2004) for image registration. Flies were cold  
1583 anaesthetized and mounted on a custom fly holder, modified from  
1584 (Weir et al., 2016), with the head pitched forward so that its

1585 posterior surface was approximately horizontal (Fig. S1A).  
1586 Surfaces of the fly holder visible to the fly were covered in matte  
1587 white paint (Citadel) and roughened to reduce confounding  
1588 reflected polarized light cues (Foster et al., 2018). We fixed the fly  
1589 to the holder using UV-curing glue (Fotoplast) around the  
1590 posterior-dorsal cuticle of the head and at the base of the wings on  
1591 either side of the thorax. To reduce movement of the brain we fixed  
1592 the legs, abdomen and proboscis with beeswax. We used forceps  
1593 to remove the cuticle and air-sacs above the optic lobe or central  
1594 brain, depending on the recording site, and cut muscle 1  
1595 (Demerec, 1950) to reduce movement. Physiological saline (103  
1596 mM NaCl, 3 mM KCl, 1.5 mM CaCl<sub>2</sub>, 4 mM MgCl<sub>2</sub>, 26 mM  
1597 NaHCO<sub>3</sub>, 1 mM NaH<sub>2</sub>PO<sub>4</sub>, 10 mM trehalose, 10 mM glucose, 5  
1598 mM TES, 2 mM sucrose) was perfused continuously over the brain  
1599 at 1.5 ml/min via a gravity drip system and the bath was  
1600 maintained at 22°C for the duration of experiments by an inline  
1601 solution heater/cooler (SC-20, Warner Instruments) connected to a  
1602 temperature controller (TC-324, Warner Instruments).

### 1603 Imaging setup

1604 We used a two-photon excitation scanning microscope controlled  
1605 by Slidebook (ver. 6, 3i) with a Ti:sapphire laser (Chameleon  
1606 Vision, Coherent) at 920 nm and a 40× objective (0.8 numerical  
1607 aperture, NIR Apo, Nikon). For each brain area imaged, we aimed  
1608 to capture the full extent of the volume of labeled neurons, using a  
1609 maximum step-size of 4 μm between imaging planes, and  
1610 maintained a volume-rate of at least 1 Hz. Image resolution varied  
1611 depending on the number of planes captured but was not less than  
1612 100 pixels in the longest dimension. We recorded frame capture  
1613 markers and stimulus events on a DAQ (6259, NI) sampling at 10  
1614 kHz.

### 1615 Polarized light stimulus

1616 We used a custom polarized light stimulus device comprising a UV  
1617 LED (M340D3, Thorlabs), a 7.5 mm diameter aperture, a ground  
1618 glass diffuser (DGUV10-1500, Thorlabs), a low-pass filter  
1619 (FGUV11, Thorlabs), and a removable linear polarizer (BVO UV,  
1620 Bolder Optic). The UV LED was controlled through MATLAB 2017a  
1621 (Mathworks, MA) via a DAQ (6259, NI) and LED driver (LEDD1B,  
1622 Thorlabs). The polarizer was rotated with a bipolar stepper motor  
1623 (ROB-10551, SparkFun) and spur gears (1:1), and a motor driver  
1624 (ROB-12779, SparkFun) controlled through MATLAB (2017a,  
1625 Mathworks) via a DAQ (USB1208, MCC), with a minimum  
1626 step-size of 7.5°. The motor was operated in open-loop and a Hall  
1627 effect sensor (A1324, Allegro) was used to detect the proximity of  
1628 a magnet which passed once per revolution, in order to verify  
1629 correct operation. Angles of polarization and directions of rotation  
1630 are expressed from an external viewpoint looking towards the fly  
1631 (Fig. S1A). 0°/180° corresponds to a vertical orientation in the  
1632 transverse plane and an alignment with the fly's long-axis in the  
1633 horizontal plane. We investigated the reproducibility of the  
1634 polarizer's angular positions and measured <1° variation over  
1635 multiple revolutions and <1° of position hysteresis (backlash) after  
1636 reversing the direction of rotation. The surface of the polarizer was  
1637 positioned frontally, 110 mm from the fly's head at an elevation of  
1638 approximately 65° above the eye-equator (Fig. S1A). The light  
1639 subtended a solid angle of approximately 4° and the entirety of the  
1640 fly, including the dorsal rim area of both eyes, was illuminated. We  
1641 measured approximately 0.8 μW/cm<sup>2</sup> irradiance at the fly's head at  
1642 the spectral peak of 342 nm (8.7 nm FWHM) with the polarizer  
1643 attached (Fig. S1B). We calibrated the LED power in order to  
1644 maintain a similar irradiance value with the polarizer removed (Fig.  
1645 S1B). We measured a ± 5% modulation in light intensity over a full  
1646 revolution of the device (Fig. S1B), due to a slight off-axis tilt of the



diffuser and polarizer. This intensity modulation was of similar magnitude both with the polarizer attached and removed, and was therefore unlikely to be an effect of polarization. We reasoned that if calcium activity in neurons was modulated by the rotation of the device with the polarizer attached, but not with the polarizer removed, then the varying angle of polarization throughout the revolution was its cause, rather than the varying light intensity. To quantify the difference in modulation between these two polarizer conditions, we report the change in polarization-selectivity index ( $\Delta$ PSI) throughout (see *Polarization-selectivity index*).

We verified that the polarized light stimulus elicited an expected response in the dorsal rim photoreceptors by recording calcium signals in R7/R8 terminals in the medulla dorsal rim area (MEDRA) (Fig. S1C–E). We observed preferential responses to different angles of polarized light across the MEDRA and approximately orthogonal preferred angles within R7/R8 pairs in individual columns (Fig. S1C–E). Moving anterior to posterior across the right MEDRA, the preferred angle of polarization rotated counter-clockwise (Fig. S1E), matching a previous characterization (Weir et al., 2016). We estimated that at least 80% of MEDRA columns were stimulated and conveyed polarization tunings that matched predictions based on the anatomy of photoreceptors at corresponding positions (Weir et al., 2016) (Fig. S1E–G), with weak responses or deviations observed only in the anterior-most columns (Fig. S1E,F) likely due to their posterior receptive fields which faced away from the stimulus. With the polarizer removed, we observed no spatial organization of tunings in photoreceptor terminals and PSI values close to zero (Fig. S1J), indicating reduced modulation of activity by the stimulus.

#### LED display

We used a  $32 \times 96$  pixel display, composed of  $8 \times 8$  panels of LEDs (470 nm, Adafruit) with controllers (Reiser and Dickinson, 2008), arranged in a half-cylinder spanning  $\pm 90^\circ$  azimuth from visual midline and approximately  $\pm 30^\circ$  elevation from the eye-equator (Fig. S1A). Each LED pixel subtended a solid angle of approximately  $1.5^\circ$  at the eye-equator. At their maximum intensity, we measured approximately  $0.11 \mu\text{W}/\text{m}^2$  irradiance at the fly's head at the spectral peak of 460 nm (243 nm FWHM).

#### Experimental protocols

Visual stimuli were presented in sets as described below. Between each stimulus set, 10 s of spontaneous activity was recorded in darkness with no visual stimulation. The polarizer could only be removed or attached between recordings, but could be done so while maintaining the same imaging parameters and field-of-view under both conditions.

#### Angle of polarization tuning

To characterize responses to different angles of polarization, we rotated the polarizer discontinuously in  $30^\circ$  steps with the UV LED on throughout. Each of the 12 positions (6 unique angles of polarization) was maintained for 4–4.5 s and we used 4 s of imaging data collected during this period in our analysis. The polarizer was then rotated through  $30^\circ$  in 0.5 s. At least two complete revolutions of the polarizer were made. For recordings with the polarizer removed, the procedure was repeated and one revolution of the stimulus was made.

#### Polarized light flash

To characterize responses to individual wide-field flashes of polarized light, the polarizer was first rotated to  $0^\circ$  (vertical) in darkness. A series of three flashes of the UV LED were presented, 4 s on:4 s off. After 10 s the same procedure was repeated with the polarizer at  $90^\circ$  (horizontal). The light was the same used in

the tuning protocol. For recordings with the polarizer removed, the procedure was repeated with flashes at the  $0^\circ$  position.

#### Unpolarized light flash

To characterize responses to individual wide-field flashes of unpolarized light, the entire LED display was illuminated following the same procedure as for polarized light flashes.

#### Bars

To characterize retinotopic responses to unpolarized stimuli, a single bright, vertical bar was presented on the LED display ( $32 \times 1$  pixel) with all other LEDs off (0.78 Weber contrast). Bars initially remained stationary for 3 s, then jittered left and right ( $\pm 1$  pixel) for 3 s, followed by an inter-trial period of 4 s with all LEDs off. Bars were presented at five equally spaced azimuth positions spanning  $\pm 90^\circ$ , presented sequentially from left to right around the fly. This procedure was repeated twice.

#### Optic flow

To characterize responses to unpolarized motion stimuli, a sparse random dot pattern was presented on the LED display that simulated forward translational optic-flow (thrust), with the frontal point of expansion approximately at the eye-equator. Approximately 1% of LEDs in the display were illuminated in each frame of the pattern, with all other LEDs off (0.83 Weber contrast). Windowed regions of this pattern were presented sequentially (lateral-left:  $-90^\circ$ : $-50^\circ$  azimuth; frontal:  $-40^\circ$ : $+40^\circ$  azimuth; lateral-right:  $+50^\circ$ : $+90^\circ$  azimuth; each covering the full elevation extent of  $\pm 30^\circ$ ) followed by the whole pattern ( $-90^\circ$ : $+90^\circ$  azimuth). Motion was presented in each region for 4 s, with an inter-trial period of 4 s with all LEDs off. This procedure was repeated twice.

#### Data analysis

##### Data export

Recorded imaging data was exported as 8-bit tiff frames. We compiled all time-points for a single imaging plane and a maximum average intensity projection (MIP, detailed below) across all planes at each time-point.

##### Image registration

We used a DFT-based registration algorithm (Guizar-Sicairos et al., 2008) to first correct for motion in the MIP of the activity-independent tdTomato channel across all timepoints. We then applied the same registration displacements ( $x,y$ ) to all individual planes of the activity-dependent GCaMP channel.

##### Maximum intensity projection

We constructed a maximum intensity projection (MIP) based on each imaging plane's time-averaged fluorescence intensities, which avoided a bias towards bright cells which did not necessarily show modulation (versus cells which were inhibited for the majority of an experiment but were modulated nonetheless). The time-series of each pixel in the projection also originated from a fixed plane throughout the recording. In summary: for each imaging plane, we found an average intensity image sampling only frames captured during periods of inactivity between stimulus sets. We then found the imaging plane ( $z$ ) with the highest average intensity at each position ( $x,y$ ). The intensity time-series ( $t$ ) from this location ( $x,y,z$ ) was then inserted into a new array ( $x,y,t$ ) to form the projection. Neighboring pixels in the projection could therefore contain signals from different imaging planes, but individual pixels contained signals from only one plane. All analysis was conducted on this projection unless otherwise stated.

##### Angle of polarization tuning

For each pixel, we found the average fluorescence intensity across the frames captured during each angle presentation to obtain a polarization tuning curve. Since a polarization-tuned analyser

1769 should respond identically to parallel angles of polarization (e.g.  
1770  $0^\circ/180^\circ$ ), we expected bimodal data with diametrically opposite  
1771 modes. We therefore found the axial mean resultant vector,  
1772 correcting for grouped data, and took its angle as the preferred  
1773 angle of polarization, defined modulo  $180^\circ$  (Batschelet, 1965;  
1774 Berens, 2009; Zar, 1999).

#### 1775 [Polarization-selectivity index](#)

1776 For each pixel, we found the average fluorescence intensity during  
1777 the first two presentations of the angles closest to and  
1778 diametrically opposite its preferred angle of polarization in the  
1779 tuning experiment ( $F_{pref}$ ). We then found the average intensity at  
1780 orthogonal angles ( $F_{ortho}$ ) and calculated the polarization-selectivity  
1781 index (PSI) as the difference between  $F_{pref}$  and  $F_{ortho}$ , divided by  
1782 their sum, with possible values ranging from 0 to 1. Where average  
1783 PSI values are reported for a driver line, we used a broad ROI  
1784 drawn around all labeled neurons in the brain area recorded,  
1785 which we refer to as the 'overall ROI'. To draw the overall ROI we  
1786 used an average intensity image from frames between stimulus  
1787 sets as a guide. We also used this average intensity image to  
1788 define additional regions: we defined regions of 'cells' as the  
1789 brightest 10% of pixels within the overall ROI, unless otherwise  
1790 stated (e.g. Fig. 5B,C), and 'background' as the dimmest 10% of  
1791 pixels outside of the overall ROI. For the overall ROI, cells and  
1792 background regions, the distribution of PSI values within a  
1793 recording tended to be non-normal; for average values we report  
1794 the median value for an individual animal and the mean of the  
1795 median values across animals. Where  $\Delta$ PSI values are reported,  
1796 we subtracted the mean PSI values within the same region across  
1797 all tuning experiments recorded with the polarizer removed. Where  
1798 we applied a PSI-threshold to filter polarization-selective pixels in a  
1799 recording (e.g. tuning maps, polarotopy analysis), we used the  
1800 mean + 1 SD of PSI values within its background. This typically  
1801 resulted in a PSI threshold between 0.3–0.4. This threshold was  
1802 modified for E-PG recordings in the protocerebral bridge where  
1803 PSI values of cells tended to be lower than the background when  
1804 averaged over multiple presentations; instead we used the mean +  
1805 1 SD of PSI values within cells across all tuning experiments with  
1806 the polarizer removed.

#### 1807 [Polarization tuning maps](#)

1808 To construct spatial maps of polarization tuning, we combined a  
1809 color-coded representation of preferred angle of polarization and a  
1810 grayscale representation of average intensity (Fig. S1J). Pixels  
1811 falling within the overall ROI which had an above-threshold PSI  
1812 value (see *Polarization-selectivity index*) were assigned a color  
1813 consistent with those used previously (Weir et al., 2016) to convey  
1814 their preferred angle of polarization. All other pixels with  
1815 below-threshold PSI value or falling outside of the overall ROI  
1816 convey their average intensity during periods of inactivity with a  
1817 normalized grayscale color-code (Fig. S1J).

#### 1818 [Automatically generated ROIs](#)

1819 In addition to manually drawn ROIs, we generated ROIs based on  
1820 polarization tuning maps (Fig. S2A). Briefly, we discretized tuning  
1821 maps so that they contained only 6 preferred angles of  
1822 polarization, corresponding to those presented in the tuning  
1823 experiment  $\pm 15^\circ$ , plus null values for excluded pixels. For each  
1824 angle, we identified contiguous areas of 20 or more pixels with that  
1825 tuning and retained the largest area as an ROI.

#### 1826 [Time-series](#)

1827 We found the mean fluorescence intensity of pixels within a given  
1828 ROI in each frame to obtain its time-series ( $F_t$ ). For polarization  
1829 tuning experiments, we calculated  $\Delta F/F = F_t/F_0 - 1$ , where  $F_0$  was  
1830 the root mean square value of the time-varying intensity across the

1831 entire experiment. For all other experiments, we calculated  $F_0$  as  
1832 the mean of  $F_t$  during the 0.5 s preceding stimulus onset. To find  
1833 the average time-series across multiple recordings with  
1834 mismatched sampling times, we resampled values at a common  
1835 rate using linear interpolation. This procedure produced no  
1836 discernible alteration of the original data points.

#### 1837 [Polarotopy and scatter plots](#)

1838 For recordings in the medulla and AOTU, we included only the set  
1839 of polarization-selective pixels, as described for the tuning maps  
1840 (see *Polarization tuning map*). For recordings in the bulb and  
1841 protocerebral bridge, we used ROIs drawn manually on individual  
1842 glomeruli. We projected pixel or ROI positions ( $x,y$ ) onto a single  
1843 horizontal axis (anterior-posterior in the medulla, medial-lateral in  
1844 the central brain) or vertical axis (ventral-dorsal throughout) and  
1845 then normalized to give a linear position ranging from 0 to 1. The  
1846 majority of recordings were performed in the right brain  
1847 hemisphere; where left hemisphere recordings were included, we  
1848 inverted their positions along both axes (i.e. in the medulla,  
1849 anterior positions on the left were pooled with posterior positions  
1850 on the right), since we expected the mirror-symmetric polarotopy  
1851 found in the dorsal rim (Fig. S1G,H) to be preserved downstream.  
1852 We then pooled the normalized positions and corresponding  
1853 preferred AoP across all recordings and created a scatter plot with  
1854 a random subset of 1000 data points, displaying either the  
1855 corresponding PSI value or preferred AoP as the color of each  
1856 point in the plot.

1857 We quantified circular-linear associations between preferred  
1858 angle (multiplied by two to correct for axial data) and normalized  
1859 position by finding the slope and phase offset of a regression line,  
1860 and then a correlation coefficient, according to (Kempster et al.,  
1861 2012). We found the correlation coefficient for the population by  
1862 pooling all data points, then performed a permutation test on the  
1863 pooled dataset with shuffled combinations of position and  
1864 preferred AoP and recalculated the correlation coefficient 10,000  
1865 times. We report an upper-bound on the p-value as the proportion  
1866 of shuffled datasets with a correlation coefficient exceeding that  
1867 found for the experimental dataset plus one (Phipson and Smyth,  
1868 2010). We also found the correlation coefficients for individual  
1869 recordings and an associated p-value (Kempster et al., 2012).  
1870 Where indicated, the regression lines for the pooled dataset and  
1871 for individual recordings with a sufficient number of pixels to give a  
1872 meaningful correlation ( $p < 0.05$ ) are shown on scatter plots.

1873 We applied the Fisher z-transformation to correlation  
1874 coefficients to find a mean correlation coefficient across flies. We  
1875 used a hierarchical bootstrap method (Saravanan et al.) to find  
1876 95% confidence intervals for the mean correlation coefficient  
1877 found. We resampled with replacement from the population of flies,  
1878 then resampled with replacement from all recordings made from  
1879 those flies and recalculated the mean correlation coefficient after  
1880 applying the Fisher z-transformation, repeated 10,000 times. From  
1881 the bootstrapped population of mean correlation coefficients we  
1882 found confidence intervals using the bias-corrected and  
1883 accelerated method (Efron, 1987). In all cases, the correlation  
1884 coefficient for the pooled dataset from all recordings was found to  
1885 be close to the mean coefficient for individual flies and within the  
1886 confidence interval calculated. For recordings in the bulb and  
1887 protocerebral bridge, we also calculated the circular-circular  
1888 correlation coefficient (Berens, 2009; Zar, 1999).

#### 1889 [Polar histograms](#)

1890 We found the normalized probability distribution of preferred  
1891 angles of polarization with a bin width of  $15^\circ$ . We then constructed  
1892 polar histograms with each bin's probability depicted as the area of

a wedge, rather than its radial length. We included in this analysis either all pixels within the overall ROI (Fig. 7) (see *Polarization-selectivity index*) or the region of cells only (Fig. 5) (see *Polarization tuning maps*), in which case we excluded recordings with few above-threshold pixels (less than 10% of the overall ROI). The results were qualitatively similar in both cases.

#### Population tuning vectors

For individual recordings, we found the direction and length of the population tuning in an individual animal by calculating the axial mean resultant vector of its preferred angles of polarization. For the pixel-based approach, we included all pixels within the overall ROI and weighted individual preferred angles by their PSI value (Berens, 2009), rather than applying a threshold. Since individual neurons with a larger area provided a greater contribution in this analysis we compared it with an ROI-based approach, using ROIs drawn manually on individual micro-glomeruli in the bulb. We excluded recordings with fewer than four ROIs, and weighted the individual preferred angle of an ROI by its mean PSI-value. The results were qualitatively similar for both approaches.

#### Cross-correlation

For E-PG recordings in the protocerebral bridge, we manually drew ROIs on the 16 individual glomeruli visible in each recording (one additional column on either end of the PB does not contain E-PGs). We then paired each ROI on the left side with an ROI on the right side, using a pairing scheme which wrapped on either side independently (i.e. 1L/1R, 8L/2R, 7L/3R, see Fig. 8A). For each pair, we obtained the time-series for the ROIs across all frames in the recording and found their normalized cross-correlation coefficient at zero lag, ranging from -1 to 1. We plot the coefficient values for each pair (Fig. S6A) and the mean coefficient across all pairs from all recordings after applying the Fisher z-transformation. We then shifted the pairing scheme by one position on the right side and repeated the procedure until all pairing schemes had been evaluated.

#### Auto-correlation

For recordings in the bulb, we used ROIs manually drawn on individual micro-glomeruli. For E-PG recordings in the protocerebral bridge, we used ROIs drawn on pairs of left and right glomeruli (Fig. 8A). For each ROI, we obtained the time-series across the first two cycles of the tuning experiment. We detrended the time-series and calculated its normalized auto-correlation function. We then found the time difference between the first peak in the function and the period of the stimulus presented during the tuning experiment. We plot the value of these time differences for each ROI, which we refer to as a 'peak shift' (Fig. S6D), along with limits for the maximum expected peak shift for a phase-locked response to the stimulus ( $\pm 2$  s, half the duration of each angle presentation).

#### Data and code availability

The datasets and code generated during this study are available at the Open Science Framework: [doi.org/10.17605/osf.io/3tsd6](https://doi.org/10.17605/osf.io/3tsd6)

#### Confocal imaging

##### Fly lines

The following driver lines belonging to the *Janelia* (R) (Jenett et al., 2012) and *Vienna Tiles* (VT) (Tirian and Dickson, 2017) collections, were obtained from Bloomington *Drosophila* Stock Center (BDSC): R13E04-Gal4 (48565), R13E04-LexA (53457), R13E04-p65.AD (isolated from original stock number: 86690), VT059781-Gal4.DBD (75090), R56F07-Gal4 (39160), R73C04-Gal4 (39815), R17F12-Gal4 (48779), R49E09-Gal4 (38692), R88A06-Gal4 (46847), R34H10-Gal4 (49808),

R34D03-Gal4 (49784), R34D03-LexA (54662), R19C08-Gal4 (48845), R78B06-Gal4 (48343).

The following stocks were also acquired from BDSC: Pan-R7-Gal4 (II; 8603), Pan-R7-Gal4 (III; 8604), 10xUAS-mCD8::GFP (32184), 26xLexAop-mCD8::GFP (32207), 10xUAS-mCD8::RFP, 13xLexAop-mCD8::GFP (32229), UAS-sytGCaMP6s (64415), UAS-tdTomato (36328), MCFO-4 (64088), MCFO-5 (64089), MCFO-6 (64090), [UAS-nsyb-spGFP1-10, LexAop-CD4-spGFP11] (GRASP; BDSC 64314). *trans-Tango* (77123) was provided by G. Barnea. SS00096-Gal4 was a gift from V. Jayaraman and T. Wolff.

##### Fly rearing for immunostaining

Flies were raised at 25°C on a standard cornmeal/molasses diet in bottles or vials, under a 12:12 hour dark:light cycle, and we dissected 3–4 day old female flies. For *trans-Tango* analyses we dissected 17–18 day old female flies raised at 18°C (Talay et al., 2017).

##### Immunostaining

Immunohistochemical staining was conducted as previously described (Omoto et al., 2017; 2018). Briefly, brains were dissected in phosphate buffered saline (PBS) and fixed in ice-cold 4% EM-grade paraformaldehyde in PBS for 2.5 hours. They were subsequently washed for 4 x 15 mins in ice-cold PBS followed by cold ethanol dehydration (5 min washes in 5, 10, 20, 50, 70, 100% EtOH). After incubation for approximately 12 hours in 100% EtOH at 4°C, brains were subjected to a rehydration procedure with EtOH in the reverse sequence. Brains were then washed for 4 x 15 min in ice-cold PBS and 4 x 15 min in ice-cold 0.3% PBT (PBS with 0.3% Triton X-100), followed by 4 x 15 min in room temperature (RT) 0.3% PBT. They were then incubated in blocking buffer (10% Normal Goat Serum in 0.3% PBT) for 30 min at RT. Following this, the brains were incubated in primary antibodies, diluted in blocking buffer at 4°C for approximately three days. They were subsequently washed 4 x 15 min in RT 0.3% PBT and placed in secondary antibodies diluted in blocking buffer at 4°C for approximately three days. They were finally washed 4 x 15 min in RT 0.3% PBT and placed in VectaShield at 4 °C overnight before imaging (Vector Laboratories). *trans-Tango* and GRASP analyses required separate staining of neuropil and respective fluorophores due to different incubation times.

The following antibodies were used: rat-antiDN-cadherin (DN-EX #8, 1:20, Developmental Studies Hybridoma Bank); mouse anti-neuroglial (BP104, 1:30, Developmental Studies Hybridoma Bank); chicken anti-GFP (1:1000, ab13970, Abcam); Rabbit anti-DsRed (1:1000, 632496, Clontech); rabbit anti-HA (1:300, Cell Signaling Technologies); and mouse anti-V5 (1:1000, ThermoFisher Scientific). The following secondary antibodies, IgG<sub>1</sub> (Jackson ImmunoResearch; Molecular Probes, Thermo Fisher Scientific), were used: Cy5 conjugated anti-mouse (1:300), Cy3-conjugated anti-rat (1:300), Alexa 488-conjugated rabbit-anti-GFP (1:1000), Alexa 488-conjugated anti-chicken (1:1000), Alexa 546-conjugated anti-rabbit (1:1000), and Alexa 488-conjugated anti-mouse (1:1000). The following antibodies from Abcam were also used: Cy5-conjugated anti-rat (1:300) and Cy3-conjugated anti-rabbit (1:300).

##### Confocal microscopy and image analysis

Processed brains were mounted on glass slides and imaged in either the antero-posterior (A–P) or dorsal-ventral (D–V) axis with a Zeiss LSM 700 Imager M2 using Zen 2009 (Carl Zeiss), with a 40x oil objective. Images were processed using Image J (FIJI) (Schindelin et al., 2012). Image stacks of the AOTU or EB were rotated slightly and interpolated to align the neuropil with the



2016 imaging plane. Background labeling was removed to improve  
 2017 visualization in some projections (Fig. 2B,C, Fig. 3G–G’’).

2018 **SUPPLEMENTARY INFORMATION**

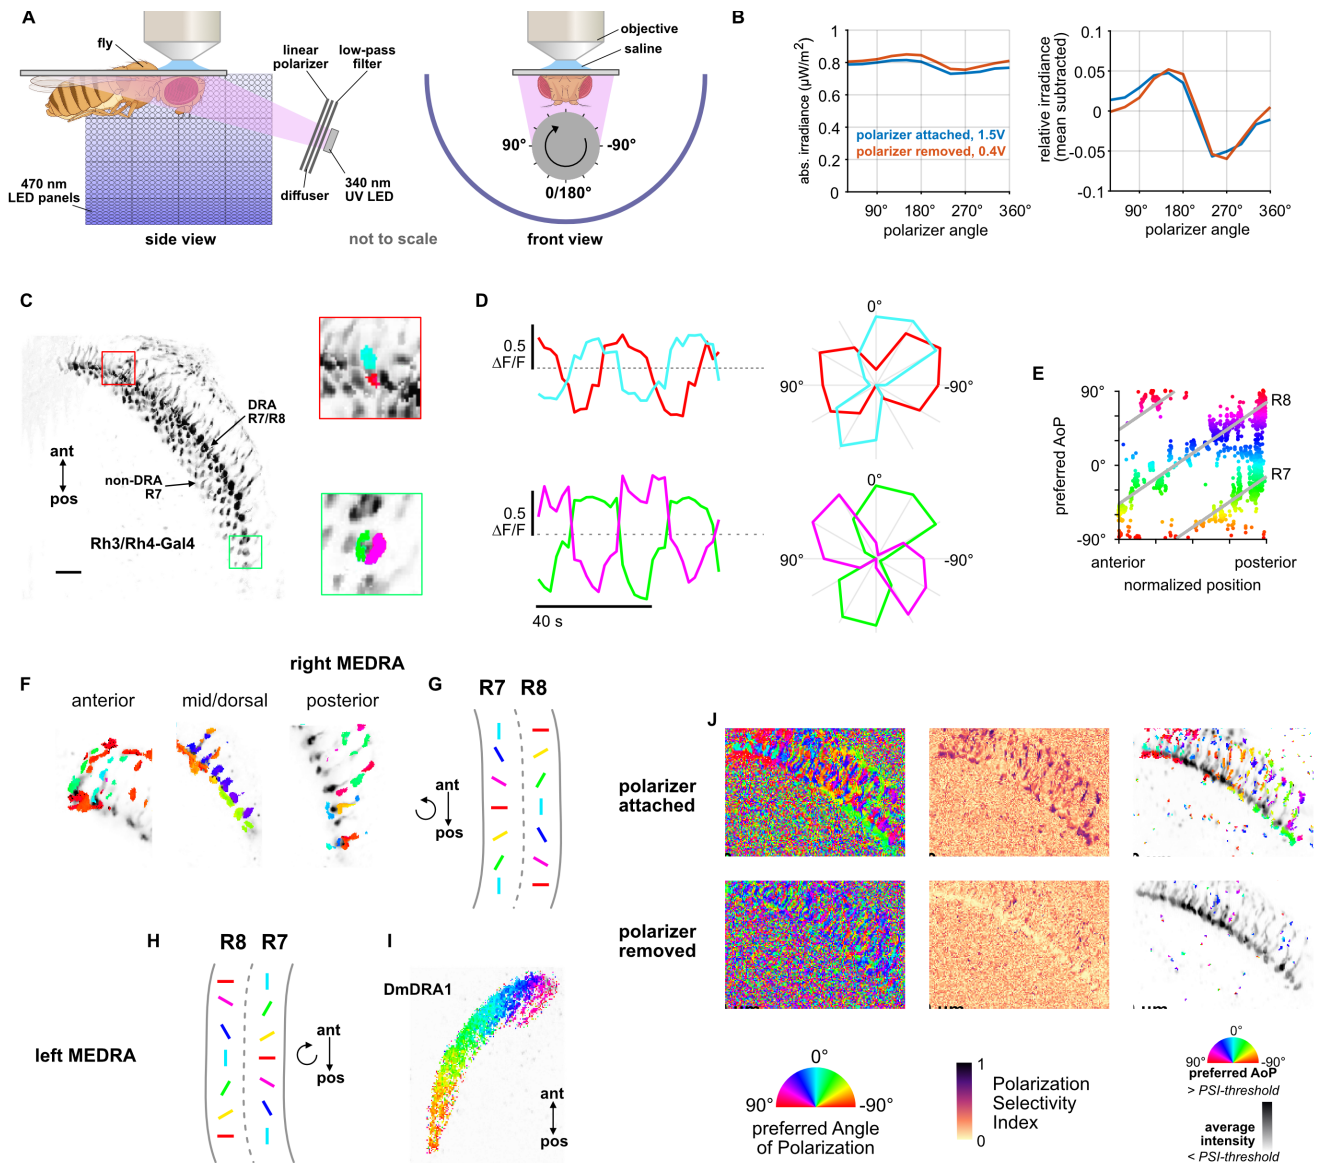

2019 **Figure S1: Polarizer characterization and R7/R8 photoreceptor stimulation**  
 2020 **A:** Schematic of experimental setup. Volumetric two-photon imaging of the medulla dorsal rim area (MEDRA) was performed while ultraviolet light was presented continuously and a  
 2021 linear polarizing filter varied the angle of polarization. Rotations and angles of polarization are expressed from the external viewpoint looking towards the animal's head. (Fly illustration:  
 2022 BioRender.com)  
 2023 **B:** Modulation of intensity over one revolution of the polarizer in absolute units (left) and with the mean subtracted (right). The amplitude of modulation (approximately  $\pm 5\%$ ) was similar  
 2024 with the polarizer attached or removed.  
 2025 **C:** Example time-averaged maximum-intensity projection of GCaMP activity in DRA R7/R8 + non-DRA R7 photoreceptors in the dorsal medulla (Rh3/Rh4-Gal4>sytGCaMP6s). Insets:  
 2026 ROIs drawn on R7 and R8 terminals in anterior (top) and posterior (bottom) MEDRA.  
 2027 **D:** GCaMP activity in R7/R8 terminals from **C** in response to rotations of polarizer. Right: Polar plot of average responses for each angle of polarization presented.  
 2028 **E:** Example scatter plot showing the polarotopic organization of DRA R7/R8 photoreceptors for the recording in **C**. Individual points represent pixels recorded from R7/R8, showing their  
 2029 normalized horizontal position in the MEDRA and their preferred angle of polarization (AoP).  
 2030 **F:** Example tuning maps of preferred AoP for recordings in a single plane, showing details of R7/R8 terminals in posterior, mid/dorsal and anterior MEDRA in the right optic lobe.  
 2031 **G:** Summary of preferred AoP in R7/R8 in the right MEDRA (from Weir et al., 2016).  
 2032 **H:** Summary of preferred AoP in R7/R8 in the left MEDRA.  
 2033 **I:** Example polarization tuning map for DmDRA1 in the left MEDRA.  
 2034 **J:** Example construction of a polarization tuning map for a maximum-intensity projection of two-photon imaging data in the medulla. Left: Preferred AoP for all pixels, with the polarizer  
 2035 attached (top) and removed (bottom). GCaMP-expressing photoreceptors can be differentiated from background noise, and show a retinotopic organization of preferred AoP only with  
 2036 the polarizer attached. Center: Polarization-selectivity index (PSI), a measure of fluorescence intensity modulation by the polarizer device, for the same data. Right: Preferred AoP values  
 2037 with a PSI-threshold applied. Below-threshold pixels (grayscale) show average intensity values over the experiment.

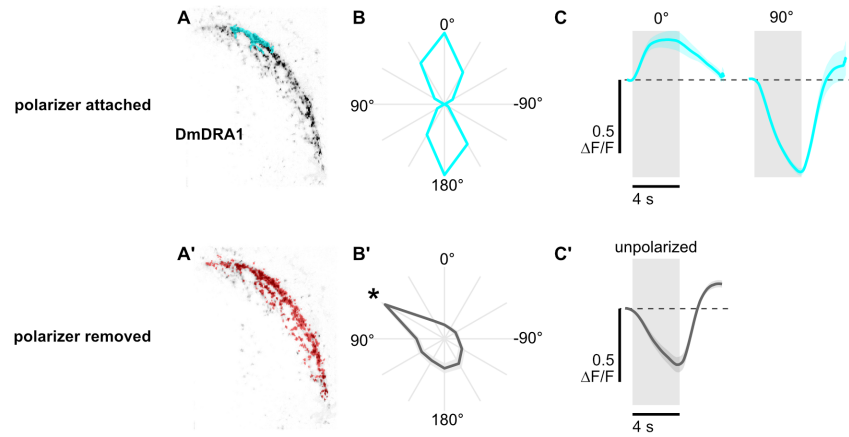

2038 **Figure S2: Polarization-opponent flash responses in DmDRA1**

2039 **A:** Example time-averaged maximum-intensity projection showing GCaMP activity in DmDRA1 neurons (DmDRA1-split>sytGCaMP6s) and example ROIs automatically-generated  
2040 around areas of DmDRA1 neurons with a preferred angle of polarization around 0° (top, cyan) or around the brightest pixels for experiments with the polarizer removed (bottom, red).

2041 **B:** Normalized tuning curves for ROIs (N = 11, one ROI per animal). Mean ± SEM. **B':** \*denotes the first angle of polarization presented, during which time activity was often falling in  
2042 experiments with the polarizer removed (see Fig. 1C).

2043 **C:** Average responses of ROIs to 4 s UV light flashes with the polarizer at 0° (pk  $\Delta F/F = 0.23$ ) and 90° (pk  $\Delta F/F = -0.64$ , N = 10, p = 0.0002), and with the polarizer removed (bottom) (pk  
2044  $\Delta F/F = -0.38$ , N = 7). Mean ± SEM.

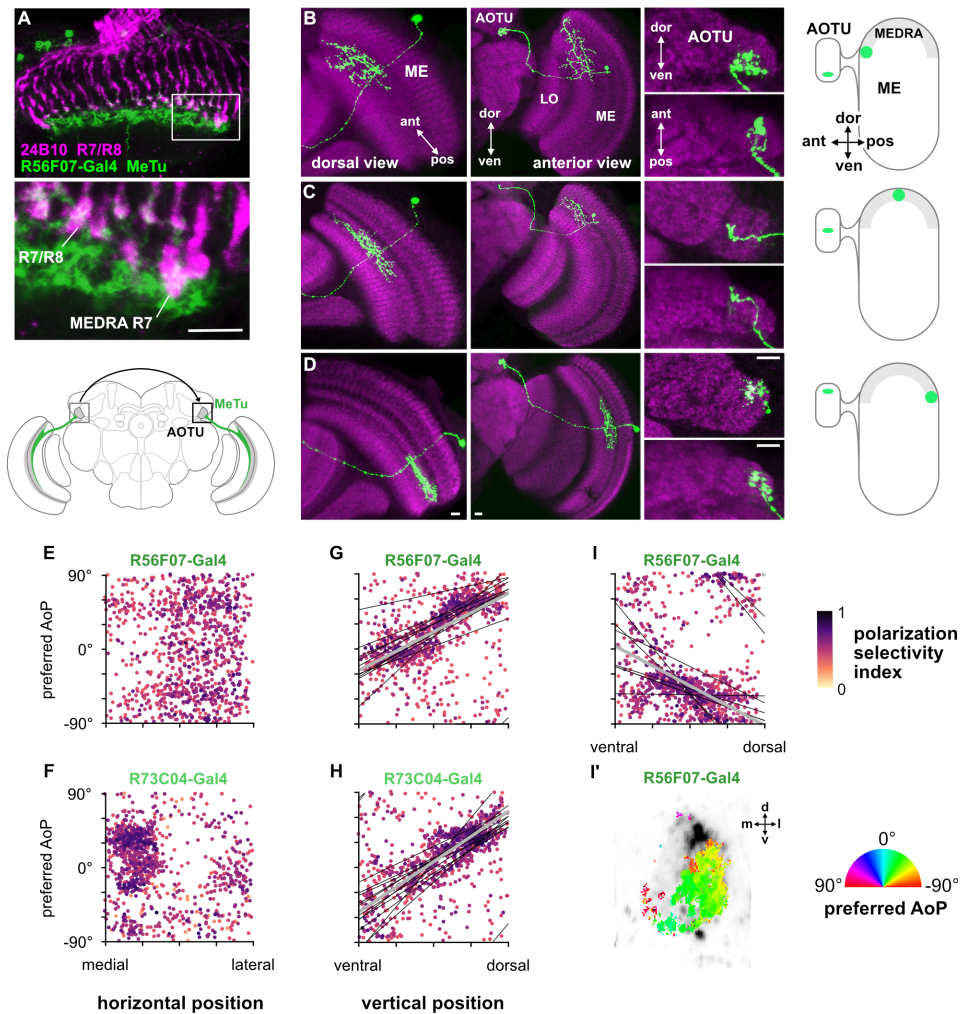

2045 **Figure S3: Retinotopic mapping of medulla dorsal rim area to AOTU by MeTu neurons and organization of polarization-selective responses**

2046 **A:** Confocal section of the medulla (dorsal view) showing R7/R8 photoreceptors (24B10 antibody staining; green) and their proximity to MeTu neurons (R56F07-Gal4>GFP; magenta).  
2047 Bottom: Enlargement of medulla dorsal rim area (MEDRA). Scale bar denotes 10  $\mu$ m.

2048 **B:** Confocal projections of a single MCF0 clone of R56F07 MeTu neurons with dendrites in the anterior/dorsal medulla (ME) in proximity to the medulla dorsal rim area. Left: Dorsal view.  
2049 Center: Anterior view. Right: High magnification projections showing the position of terminals in the anterior optic tubercle (AOTU).

2050 **C:** As in **B**, for a MeTu neuron with dendrites in the mid/dorsal medulla.

2051 **D:** As in **B**, for a MeTu neuron with dendrites in the posterior/dorsal medulla. Scale bars denote 10  $\mu$ m.

2052 **E:** Scatter plot showing the organization of polarized light responses in R56F07 MeTu neurons. Individual points represent pixels recorded in MeTu neurons, showing their normalized  
2053 horizontal position in the AOTU and their preferred angle of polarization (AoP). Color displays PSI value (pooled  $p = 0.03$ , N = 17 recordings).

2054 **F:** As in **E**, for R73C04 MeTu neurons (pooled  $p = -0.22$ , N = 11 recordings).

<sup>2055</sup> **G**: Scatter plot showing the predominant polarotopic organization of R56F07 MeTu neurons. Thin lines show linear-circular fits for data from individual animals with significant correlations  
<sup>2056</sup> (mean individual  $\rho = 0.61$ , SEM 0.16,  $N = 7$  animals), thick line shows fit for all pooled data (pooled  $\rho = 0.68$ ,  $N = 8$  recordings,  $p < 10^{-6}$  permutation test).  
<sup>2057</sup> **H**: As in **G** for R73C04 MeTu neurons (mean individual  $\rho = 0.68$ , SEM 0.12,  $N = 10$  animals), thick line shows fit for all pooled data (pooled  $\rho = 0.58$ ,  $N = 10$  recordings,  $p < 10^{-6}$  permutation test).  
<sup>2058</sup>  
<sup>2059</sup> **I**: Scatter plot showing an occasional, second organization of responses in R56F07 MeTu neurons (mean individual  $\rho = 0.52$ , SEM 0.12,  $N = 6$  animals), thick line shows fit for all pooled data (pooled  $\rho = 0.30$ ,  $N = 7$  recordings,  $p < 10^{-6}$  permutation test). **I'**: Example polarization tuning map of second organization of responses.

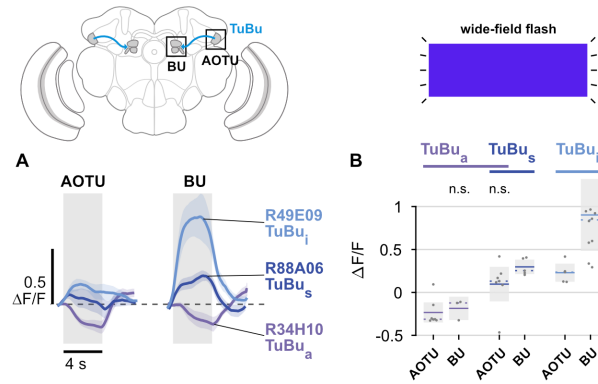

<sup>2061</sup> **Figure S4: Unpolarized flash responses in TuBu neurons**

<sup>2062</sup> **A**: Average responses of all TuBu neurons in each population to 4 s blue light flashes, recorded in the anterior optic tubercle (AOTU) (GCaMP6s) and bulb (BU) (syGCaMP6s). Mean  $\pm$   
<sup>2063</sup> SEM.

<sup>2064</sup> **B**: Peak responses for individual animals and their mean and median (dashed line). (pk  $\Delta F/F$  **TuBu<sub>a</sub>**, AOTU: -0.23, CI 0.16,  $N = 7$ ,  $p = 0.008$ , BU: -0.19, CI 0.12,  $N = 3$ ,  $p = 0.11$ ; **TuBu<sub>s</sub>** +  
<sup>2065</sup> **TuBu<sub>a</sub>**, AOTU: 0.10, CI 0.27,  $N = 7$ ,  $p = 0.38$ , BU: 0.30, CI 0.10,  $N = 5$ ,  $p = 0.02$ ; **TuBu<sub>i</sub>**, AOTU: 0.23, CI 0.12,  $N = 5$ ,  $p = 0.013$ , BU: 0.90, CI 0.68,  $N = 10$ ,  $p = 0.002$ ) Shaded box denotes  
<sup>2066</sup> Bonferroni corrected 95% confidence interval.

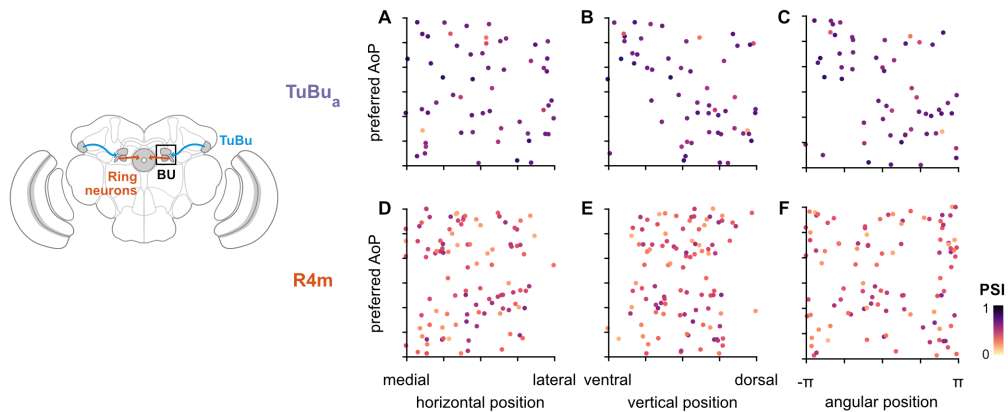

<sup>2067</sup> **Figure S5: Unstructured organization of preferred angles of polarized light in the anterior bulb**

<sup>2068</sup> **A**: Scatter plot showing the horizontal organization of **TuBu<sub>a</sub>** tunings in the anterior bulb (BU<sub>a</sub>). Individual points represent ROIs drawn on micro-glomeruli, showing their normalized  
<sup>2069</sup> horizontal position within the BU<sub>a</sub> and their preferred angle of polarization (AoP). Color of individual points displays PSI value (**TuBu<sub>a</sub>**:  $N = 8$  animals, 14 recordings, 6 left BU: 29 ROIs,  
<sup>2070</sup>  $4.8 \pm 1.0$  per animal, 8 right BU: 28 ROIs,  $4.7 \pm 0.8$  per animal; mean ROI PSI  $0.65 \pm 0.12$ ) (0 significant individual linear-circular correlations; pooled data  $\rho = -0.02$ ,  $p = 0.91$  permutation  
<sup>2071</sup> test).

<sup>2072</sup> **B**: As in **A**, for vertical organization of **TuBu<sub>a</sub>** tunings (1 significant individual linear-circular correlation,  $\rho = -0.61$ ; pooled data  $\rho = 0.46$ ,  $p = 0.002$  permutation test).

<sup>2073</sup> **C**: As in **A**, for circular organization of **TuBu<sub>a</sub>** tunings (5 significant individual circular-circular correlations, mean  $\rho = 0.84$ , SEM 0.69; pooled data  $\rho = -0.43$ ,  $p = 0.23$  permutation test).

<sup>2074</sup> **D**: As in **A**, for horizontal organization of **R4m** tunings (**R4m**:  $N = 25$  animals, 26 recordings, 2 left BU: 8 ROIs,  $4.0 \pm 0.0$  per animal, 24 right BU: 96 ROIs,  $4.0 \pm 0.8$  per animal; mean ROI  
<sup>2075</sup> PSI  $0.38 \pm 0.12$ ) (1 significant individual linear-circular correlation,  $\rho = -0.76$ ; pooled data  $\rho = 0.01$ ,  $p = 0.96$  permutation test).

<sup>2076</sup> **E**: As in **B**, for vertical organization of **R4m** tunings (0 significant individual linear-circular correlations; pooled data  $\rho = 0.09$ ,  $p = 0.47$  permutation test).

<sup>2077</sup> **F**: As in **C**, for circular organization of **R4m** tunings (3 significant individual circular-circular correlations, mean  $\rho = 0.98$ , SEM 0.34; pooled data  $\rho = 0.02$ ,  $p = 0.98$  permutation test).



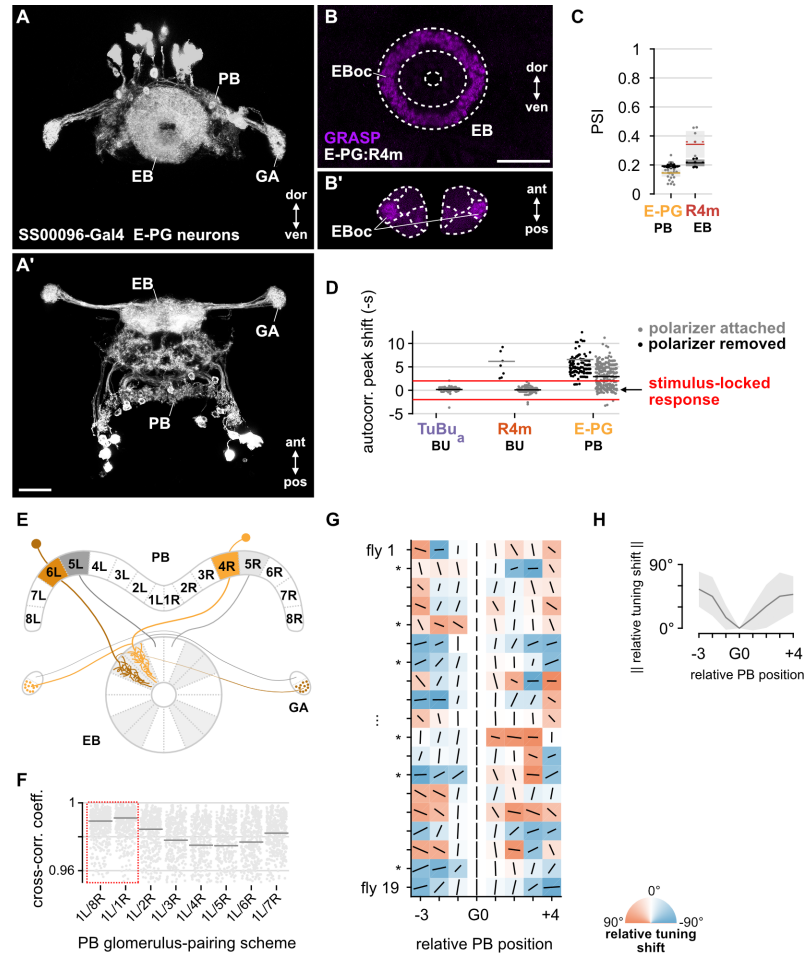

2078 **Figure S6: E-PG neurons show inconsistent responses to the angle of polarized light and variable tunings**

2079 **A:** Confocal projection (anterior view) of E-PG expression pattern in the ellipsoid body (EB), protocerebral bridge (PB) and gall (GA) (SS00096-Gal4>GFP). **A'**: Dorsal view. Scale bar denotes 25  $\mu$ m.

2080 **B:** Confocal projection of GRASP (GFP reconstitution across synaptic partners) signal for connections from E-PG to R4m neurons in the EB. **B'**: Dorsal view. Scale bar denotes 25  $\mu$ m.

2081 **C:** Average PSI values within E-PG neurons in the PB and R4m neurons in the EB (light dots) and background regions (dark dots) in individual animals (**E-PG** neurons: 0.14, CI 0.05, background: 0.19, CI 0.01, N = 22 animals, p = 0.0001 t-test; **R4m** neurons: 0.34, CI 0.11, background: 0.21, CI 0.03, N = 7 animals, p = 0.02 t-test).

2082 **D:** Shift in time of the first peak of an ROI's auto-correlation function, relative to the period of the polarizer (0 s). Red lines indicate a window of  $\pm 2$  s: a peak shift of greater magnitude indicates a response which was not phase-locked with the polarizer stimulus (median peak shift **TuBu**: attached 0.15 s, CI 0.59, N = 7 animals, 85 ROIs included; **R4m**: attached 0.07 s, CI 0.56, N = 25 animals, 126 ROIs included; removed 5.76 s, CI 8.91, N = 9 animals, 10 ROIs included; **E-PG**: attached 2.73 s, CI 2.77, N = 22 animals, 504 ROIs included; removed 4.79 s, CI 5.63, N = 18 animals, 175 ROIs included).

2083 **E:** Summary schematic of E-PG neuron innervation patterns in the ellipsoid body (EB) and protocerebral bridge (PB) and gall (GA). Highlighting indicates the L/R pairing scheme used. 9L/9R in PB not shown.

2084 **F:** Normalized cross-correlation coefficient for all E-PG pairs of left and right glomeruli in the PB, using different pairing schemes. Each scheme name gives the pairing of 1L and its right PB partner; all other pairs within the scheme follow the same logic. Horizontal lines mark the Fisher z-transformed mean coefficient (N = 22 animals). Highlighted schemes represent pairings of E-PGs innervating neighboring wedges of the EB. Pairing scheme 1L/1R is used in this study.

2085 **G:** Relative tunings in individual animals. Orientation of lines represent preferred AoP (relative to G0), length of lines indicate PSI (height of each square is equal to a PSI value of 1).

2086 Asterisks indicate significant individual circular-circular correlations between position and preferred AoP.

2087 **H:** Average tuning shift (relative to G0), summarizing data in **G**. Mean  $\pm$  SEM (N=19).
